# Supplementary material for: Adherence management for patients with cancer taking capecitabine: a prospective two-arm cohort study
Source: PubMed Central journal article supplement — BMJ Open. 2013 Jul 18;3(7):e003139. doi: 10.1136/bmjopen-2013-003139 (PMC3717446; doi:10.1136/bmjopen-2013-003139), 2013-07-18
Supplement: bmjopen-2013-003139.draft_revisions.pdf [file bmjopen-2013-003139.draft_revisions.pdf]

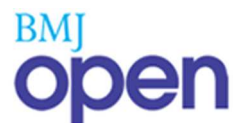

**Adherence management for cancer patients on capecitabine: a prospective two-arm cohort study**

|                                 |                                                                                                                                                                                                                                                                                                                                                                             |
|---------------------------------|-----------------------------------------------------------------------------------------------------------------------------------------------------------------------------------------------------------------------------------------------------------------------------------------------------------------------------------------------------------------------------|
| Journal:                        | <i>BMJ Open</i>                                                                                                                                                                                                                                                                                                                                                             |
| Manuscript ID:                  | bmjopen-2013-003139                                                                                                                                                                                                                                                                                                                                                         |
| Article Type:                   | Research                                                                                                                                                                                                                                                                                                                                                                    |
| Date Submitted by the Author:   | 29-Apr-2013                                                                                                                                                                                                                                                                                                                                                                 |
| Complete List of Authors:       | Krolop, Linda; University of Bonn, Clinical Pharmacy<br>Ko, Yon-Dschun; Johanniter Hospital, Internal Medicine<br>Schwindt, Peter; Oncology Practice,<br>Schumacher, Claudia; St. Elisabeth Hospital, Breast Unit/Senology<br>Fimmers, Rolf; University of Bonn, Medical Biometry, Informatics and<br>Epidemiology<br>Jaehde, Ulrich; University of Bonn, Clinical Pharmacy |
| <b>Primary Subject Heading</b>: | Oncology                                                                                                                                                                                                                                                                                                                                                                    |
| Secondary Subject Heading:      | Health services research, Medical management, Patient-centred medicine                                                                                                                                                                                                                                                                                                      |
| Keywords:                       | Quality in health care < HEALTH SERVICES ADMINISTRATION & MANAGEMENT, Organisation of health services < HEALTH SERVICES ADMINISTRATION & MANAGEMENT, Adult oncology < ONCOLOGY                                                                                                                                                                                              |
|                                 |                                                                                                                                                                                                                                                                                                                                                                             |

SCHOLARONE™  
Manuscripts

1  
2  
3 **Adherence management for cancer patients on capecitabine: a**  
4 **prospective two-arm cohort study**  
5  
6

7 Linda Krolop, Yon-Dschun Ko, Peter Florian Schwindt, Claudia Schumacher, Rolf Fimmers,  
8 Ulrich Jaehde  
9

10  
11  
12 Institute of Pharmacy, Clinical Pharmacy, University of Bonn, An der Immenburg 4, 53121  
13 Bonn, Germany Linda Krolop pharmacist; Internal Medicine, Johanniter Hospital,  
14 Johanniterstrasse 3-5, 53113 Bonn, Germany Yon-Dschun Ko professor of internal medicine;  
15 Oncology Practice, Straesschensweg 16, 53113 Bonn, Germany Peter Florian Schwindt  
16 oncologist; Specialist Breast Unit / Senology, St. Elisabeth Hospital Cologne-Hohenlind,  
17 Werthmannstraße 1, 50935 Cologne, Germany Claudia Schumacher senior physician; Institute  
18 for Medical Biometry, Informatics and Epidemiology, University of Bonn, Sigmund-Freud-Str.  
19 25, 53127 Bonn, Germany Rolf Fimmers statistician; Institute of Pharmacy, Clinical Pharmacy,  
20 University of Bonn, An der Immenburg 4, 53121 Bonn, Germany Ulrich Jaehde professor of  
21 clinical pharmacy  
22  
23  
24  
25  
26  
27  
28  
29

30 Correspondence to: Prof. Dr. Ulrich Jaehde, u.jaehde@uni-bonn.de, Tel: +49-228-73-5252, Fax:  
31 +49-228-73-9757  
32  
33  
34  
35

36 Key words: adherence, compliance, capecitabine, pharmaceutical care, oral chemotherapy  
37

38 Word count: 4,021  
39  
40  
41  
42  
43  
44  
45  
46  
47  
48  
49  
50  
51  
52  
53  
54  
55  
56  
57  
58  
59  
60

## ARTICLE SUMMARY

### Article Focus

- Adequate patient adherence to capecitabine, an orally administered prodrug of fluorouracil, is essential for treatment success. The early identification of potential non-adherers followed by adherence-enhancing measures may contribute to the effectiveness of oral anticancer drug therapy.
- This prospective, multi-centred observational cohort study aimed at the development and evaluation of a multiprofessional approach to assure adherence to capecitabine.
- It was hypothesized that adherence of initially adherent patients ( $\geq 90\%$  adherence during the first cycle) would remain high over time without specific support and that initially non-adherent patients ( $< 90\%$  adherence during the first cycle) would benefit from specific adherence support.

### Key Messages

- An early adherence screening effectively distinguishes between patients adhering and non-adhering to capecitabine.
- The provision of specific adherence support can enhance adherence of initially non-adherent patients.
- Initially adherent patients remain adherent for at least six cycles without specific support.

### Strengths and Limitations

- Our approach is multiprofessional and needs-based utilising available resources for adherence management most efficiently.
- The relatively small sample size of initially non-adherent patients limits the validity of the observed results for this subgroup of patients.

## ABSTRACT

**Background:** Capecitabine, an orally administered prodrug of fluorouracil, is administered twice daily for 14 days followed by a seven day rest period. Adequate patient adherence is essential for treatment success. The early identification of potential non-adherers followed by adherence-enhancing measures may contribute to the effectiveness of oral anticancer drug therapy.

**Objective:** To develop and evaluate a multiprofessional approach to assure adherence to capecitabine.

**Methods:** The study was conducted as a prospective, multi-centred observational cohort study. All participants received pharmaceutical care consisting of oral and written information. Daily adherence was defined as percentage of days with correctly administered capecitabine doses and assessed using electronic monitoring (MEMS®). According to their daily adherence during the first cycle, patients were identified as initially non-adherent (<90% adherence) or adherent (≥90% adherence). Initially non-adherent patients received additional adherence support.

**Results:** Seventy-three patients with various tumour entities were enrolled, 58 were initially adherent and 15 non-adherent. Median daily adherence of initially non-adherent patients increased from 85.7% to 97.6% during the observation period of six cycles. Throughout all cycles, median daily adherence of initially adherent patients was 100.0%. Daily adherence was not associated with socio-demographic and disease-related factors. No patient was non-persistent.

**Conclusions:** An early adherence screening effectively distinguishes between patients adhering and non-adhering to capecitabine. The provision of specific adherence support can enhance adherence of initially non-adherent patients, whereas initially adherent patients remain adherent for at least six cycles without specific support. Our needs-based approach helps to use available resources for adherence management efficiently.

## INTRODUCTION

Cancer therapy has traditionally been dominated by intravenously administered agents.<sup>1</sup> However, oral anti-cancer drugs are increasingly used and more than one-quarter of all anti-cancer drugs currently under development are orally administered.<sup>2,3</sup> Oral anti-cancer therapies are highly accepted by patients based on obvious advantages, e.g. higher convenience, avoidance of venipuncture and paravasates, and greater patient autonomy.<sup>2,4,5</sup> However, these treatments are also associated with many challenges. Due to less intense contact between patient and health care providers, responsibilities in terms of managing the course of treatment are transferred to the patient such as monitoring of doses and toxicity.<sup>2,6</sup> In contrast to intravenously administered anti-cancer treatments, health care providers cannot always assume that patients are adherent which is, however, the key prerequisite for treatment success. Multidisciplinary patient care and specific patient education regarding all aspects of the treatment regimen are crucial to maintain adherence.<sup>6-9</sup>

Patients of the present study were treated with the chemotherapeutic agent capecitabine, an orally administered prodrug of cytotoxic fluorouracil (5 FU). Capecitabine has an improved tolerability and comparable efficacy compared with infusional or bolus 5 FU<sup>10</sup> and is frequently used in the treatment of breast, colorectal, and gastric cancer. Moreover, ovarian, pancreatic, or oesophageal tumours may be treated with capecitabine. Usually it is given in three-week cycles, twice per day for two weeks separated by 12 hours, followed by a one-week medication-free interval.<sup>11</sup>

Patient adherence to prescribed treatment regimens for chronic non-oncologic diseases accounts for 50% on average only.<sup>12,13</sup> Cancer patients' medication taking behaviour is presumed to be particularly adherent, since cancer is a life-threatening disease.<sup>14-18</sup> However, adherence rates of oral anti-cancer agents were reported to range from 16% to 100% depending on the drug and method of measurement.<sup>15</sup> Exact measurement of adherence is a challenge and existing methods are limited for various reasons.<sup>19</sup> Best estimation of adherence may be provided by electronic monitoring such as the medication event monitoring system (MEMS<sup>®</sup>).<sup>20</sup>

Several studies have been published investigating patient adherence to capecitabine. Partridge et al used MEMS<sup>®</sup> for adherence assessment in older women with early-stage breast cancer and defined adherence as the number of doses taken divided by doses expected. 75% of patients performed more than 80% of expected openings and were regarded as adherent. Average adherence was 78% across all cycles.<sup>21,22</sup> Winterhalder et al used participant self-reports in gastrointestinal and breast cancer patients. 91% (161/177) patients were found to be fully adherent, whereas only 9% (16/177) reported some kind of adherence error, i.e. any violation of the recommended regimen.<sup>14</sup> In 13 younger metastatic breast cancer patients, median adherence assessed using MEMS<sup>®</sup> was 96%. Adherence was defined as observed divided by expected

1  
2  
3 doses. Self-reported median adherence of 12 patients was 97%.<sup>23</sup> In 43 breast and colorectal  
4 cancer patients, self-reported non-adherence was 23.3%.<sup>24</sup> Furthermore, the effect of an  
5 intensified multidisciplinary pharmaceutical care programme on the adherence of cancer  
6 patients treated with capecitabine was investigated. Adherence was measured using MEMS<sup>®</sup>  
7 and defined as the percentage of days with correct medication taking behaviour. Patients who  
8 received pharmaceutical care showed a significantly higher mean daily adherence compared to  
9 the control group who received standard care (96.8% vs 87.2%, p=0.029).<sup>25</sup>  
10  
11  
12  
13

14 Thus, adherence rates of patients treated with capecitabine are relatively high compared to non-  
15 oncologic oral drugs but can still be increased by specific measures.<sup>25</sup> Conversely, this implies  
16 that only some patients treated with capecitabine are in need of an adherence-enhancing  
17 intervention and the limited resources could be used more efficiently. Certain patients manage  
18 their oral treatment regimen independently and do not benefit from a specialized patient care. In  
19 this study, we screened cancer patients for their adherence during their first capecitabine cycle  
20 to detect potential non-adherers. Initially adherent as well as non-adherent patients received  
21 basic pharmaceutical care and adverse event management. Specific adherence support was only  
22 applied to initially non-adherent patients.  
23  
24  
25  
26  
27

28 The aim of the present study was to identify initially non-adherent patients and to investigate  
29 initially non-adherent and initially adherent patients' adherence over time. It was hypothesized  
30 that adherence of initially adherent patients would remain high over time without specific  
31 support and that initially non-adherent patients would benefit from specific adherence support.  
32  
33  
34  
35  
36  
37  
38  
39  
40  
41  
42  
43  
44  
45  
46  
47  
48  
49  
50  
51  
52  
53  
54  
55  
56  
57  
58  
59  
60

## METHODS

### Study design

The study was conducted as a prospective, multi-centred, two-arm observational cohort study. One study arm consisted of patients classified as initially adherent (baseline daily adherence  $\geq 90\%$ ), the other arm of initially non-adherent patients (baseline daily adherence  $< 90\%$ ).

### Study setting and sample

The study was conducted in two oncology outpatient wards and one oncology practice. Data were collected between July 2009 and March 2012. After the identification of eligibility by the collaborating oncologists, patients were asked to participate in the study. In case of acceptance, each participant signed a written informed consent. The study protocol considered a maximum observation period of six capecitabine cycles for every participant. The main inclusion criterion was the initiation of chemotherapy with capecitabine as single agent or combination therapy for treatment of cancer. Patients had to be capecitabine-naïve, at least 18 years old and able to speak, read and write German. Inclusion had to take place within two weeks after initiation of capecitabine treatment. Exclusion criteria implied any diagnosis of a disease or mental state compromising full understanding of purpose and course of the study. The ethics committee of the University of Bonn, Germany voted positively for this study.

### Adherence measurement

Adherence to capecitabine treatment was assessed using the Medication Event Monitoring System (MEMS<sup>®</sup>, Aardex Group Ltd., Zug, Switzerland).<sup>26</sup> Every participant was provided with a MEMS<sup>®</sup> container and asked to use it for storage of capecitabine medication during study participation. The caps of the MEMS<sup>®</sup> containers recorded date and time of every opening. Patients were instructed to open the containers only when taking their capecitabine dose. In case of required refills, patients were requested to schedule refill and regular capecitabine intake at the same time in order to avoid additional openings. If this was not possible or in case of further extraordinary openings, patients were asked to note the respective information on a special documentation sheet. Since uncensored MEMS<sup>®</sup> data might overestimate non-adherence<sup>27</sup>, adherence data were censored according to information derived from notes and interviews (e.g. exclusion of self-reported non-monitoring intervals or extra openings, and intake of doses taken from another source than MEMS<sup>®</sup>). Measurement ended after six completed capecitabine cycles or in case of premature treatment discontinuation.

### Adherence analysis

Adherence was studied using medication taking profiles uploaded from the MEMS<sup>®</sup> monitors and patients' information concerning extraordinary incidents. 'Daily adherence' was selected as primary endpoint. It was defined as percentage of days with correctly administered capecitabine doses (number of days with correct drug intake divided by number of observed days). In the case of missing MEMS<sup>®</sup> data the corresponding days were not included in the analysis, i.e. the number of observed days was reduced accordingly. Adherence was assessed on days with drug intake as well as days during the rest period. A day was considered as adherent only, if two openings of the MEMS<sup>®</sup> monitor were recorded on a day during the drug intake period (dosing interval  $\geq 6$  hours) or if no openings were recorded during the rest period.

Basically, 'daily adherence' was calculated for every individual cycle (days with capecitabine intake plus therapy-free interval). Furthermore, adherence was calculated for the drug intake interval only excluding capecitabine-free days and referred to as 'daily intake adherence'. This was done in order to exclude the influence of the rest period on the adherence. Additionally, 'persistence' of drug intake was analysed. Duration of physician's capecitabine prescription was compared with the duration of the actual treatment by the participant.

For the classification of a participant as initially adherent or non-adherent, daily adherence was calculated for the intake period of the first cycle plus first day of the therapy-free interval. This parameter is referred to as 'baseline daily adherence'. A participant was classified as initially adherent (baseline daily adherence  $\geq 90\%$ ) or initially non-adherent (baseline daily adherence  $< 90\%$ ). Since no consensual standard for the definition of sufficient adherence exists<sup>16</sup>, the threshold of 90% was defined empirically based on the results of an earlier research project<sup>25</sup>. If assessment of baseline adherence resulted in a participant being initially non-adherent, adherence support was provided before the start of the second intake period.

### Modular medication management

In addition to standard care provided by physicians and nurses of the respective study centre, medication management consisted of three modules. These modules were provided by a registered pharmacist of the Department of Clinical Pharmacy at the University of Bonn, Germany. Every study participant received module 1 (basic pharmaceutical care) as well as module 2 (adverse event management). If a participant was initially non-adherent, module 3 (adherence support) was applied additionally.

Modules 1 and 2 were initiated after inclusion. Module 1 implied detailed medication history taking to perform drug-drug interaction checks and compile an individual medication plan. In case of identified drug-related problems, necessary changes of the medication were made in



1  
2  
3 collaboration with the responsible physician. Patients were educated in detail about the  
4 cytotoxic agent capecitabine, its mechanism of action and the individual dosing regimen.  
5 Further anti-cancer agents, supportive therapy and other agents taken regularly were also  
6 addressed. Patient counselling was supported by the provision of written information material.  
7 Within module 2, patients were educated regarding common adverse effects (eg, hand-foot  
8 syndrome and diarrhea). Prophylaxis, detection and treatment of adverse effects were discussed  
9 in detail. If patients took other drugs or were prescribed a concomitant anti-cancer treatment,  
10 they were counselled regarding the adverse effects of these drugs as well. An information  
11 brochure regarding prevention and management of adverse effects caused by chemotherapy  
12 supported oral counselling.  
13  
14  
15  
16  
17

18  
19 Module 3 contained a detailed discussion of the patient's individual adherence results on the  
20 basis of cycle 1 MEMS<sup>®</sup> data. Adherence support focussed on the identification of reasons for  
21 non-adherence to define a feasible adherence-enhancing strategy. Since various types of non-  
22 adherence exist, strategies to overcome individual barriers to adherence were designed  
23 individually. Strategies to improve unintentional non-adherence (eg due to forgetfulness)  
24 included treatment diaries or linking drug intake with a certain act of daily routine (cue dosing).  
25 In contrast, intentional non-adherence had to be approached in a completely different manner. If  
26 an adverse effect was the reason for not taking capecitabine, management and prevention of  
27 further adverse effects were addressed in accordance with module 2. Patients' expectations and  
28 experiences were included in all considerations. Moreover, an increase of the patient's  
29 awareness of the importance of adherence with capecitabine treatment was aimed. Routinely,  
30 beginning and end of the current and next capecitabine cycle were explicitly discussed. The  
31 content and course of the adherence-supporting session was adapted according to the patients'  
32 medication taking behaviour. If the participant showed a daily adherence <90%, the content of  
33 the first counselling session of module 3 was repeated and adherence-enhancing strategies were  
34 reassessed, discussed and adapted.  
35  
36  
37  
38  
39  
40  
41  
42

43  
44 Personal follow-up visits took place at least once every cycle. Between scheduled appointments  
45 every participant had the possibility to reach individual advice in person, by telephone or by  
46 email.  
47  
48  
49

### 50 **Sample size calculation and statistical analysis**

51  
52 Sample size determination was conducted for the primary endpoint 'daily adherence'. Available  
53 adherence data<sup>25</sup> was analysed with regard to daily adherence of the participant's first  
54 capecitabine cycle. Regarding initially adherent patients a sample size of 45 was required to  
55 show with a power (1- $\beta$ ) of 80% that >75% of these patients remain being adherent (error of  
56 first kind ( $\alpha$ ) = 5%). The true population value of patients who persist being adherent was  
57  
58  
59  
60

1  
2  
3 assumed to account for >90%. Regarding initially non-adherent patients, a sample size of 30  
4 patients was required to show with a power (1- $\beta$ ) of 80% that >80% of these patients become  
5 adherent after the adherence support (error of first kind ( $\alpha$ ) = 5%). The true population value of  
6 patients who became adherent was assumed to account for >95%. Finally a dropout rate of 20%  
7 was estimated so that a total sample size of 90 patients resulted (54 initially adherent and 36  
8 initially non-adherent patients).  
9

10  
11  
12 Data entry and statistical data analysis were carried out using Excel<sup>®</sup> 2007 (Microsoft,  
13 Redmond, USA) and SPSS<sup>®</sup> Version 20 (SPSS<sup>®</sup> Inc., Chicago, USA, Statistical Package for the  
14 Social Sciences). Appropriate descriptive statistics was used to characterise the patient  
15 population and summarise the study results. Data were mostly binary, nominal, ordinal, or failed  
16 to follow a normal distribution, thus non-parametric testing was utilised consistently.  
17 Differences regarding socio-demographic and disease-related characteristics between initially  
18 adherent and non-adherent patients were tested using the Fisher's exact test for nominal data. To  
19 explore the relationship between adherence and potential predictors of adherence, Spearman's  
20 rank correlation coefficient was used for comparing two continuous data sets and Mann-  
21 Whitney-U analysis was used for comparing continuous (not normally distributed) data with  
22 binary data sets  
23  
24  
25  
26  
27  
28  
29  
30  
31  
32  
33  
34  
35  
36  
37  
38  
39  
40  
41  
42  
43  
44  
45  
46  
47  
48  
49  
50  
51  
52  
53  
54  
55  
56  
57  
58  
59  
60

## RESULTS

Participating oncologists assessed 97 patients for eligibility, 78 were enrolled in the study. Figure 1 provides a detailed overview of patient recruitment including reasons for exclusion and loss to follow-up. The main reason (seven out of eight refusals) for non-participation was perceived stress by the study in addition to their mentally and/or physically impaired condition. Since five patients were not capecitabine-naïve, two patients were not able to speak, read and write German and for four patients MEMS<sup>®</sup> use was not possible due to participation in another trial, they were not enrolled.

### Patient characteristics

Seventy-three patients were analysed for baseline daily adherence, 58 were initially adherent and 15 initially non-adherent. Table 1 shows that there was no statistically significant difference between initially adherent and non-adherent patients regarding socio-demographic and disease-related characteristics. However, there was a significant difference in the therapy setting ( $p=0.021$ , Fisher's exact test).

Table 1: Socio-demographic and disease-related patient characteristics

| Socio-demographic characteristics           | initially adherent        |          | initially non-adherent |      | P value |       |
|---------------------------------------------|---------------------------|----------|------------------------|------|---------|-------|
|                                             | n                         | %        | n                      | %    |         |       |
| Classified age [years]                      | ≤ 50                      | 11       | 19.0                   | 0    | 0.0     | 0.203 |
|                                             | 51-60                     | 15       | 25.9                   | 6    | 40.0    |       |
|                                             | 61-70                     | 17       | 29.3                   | 3    | 20.0    |       |
|                                             | 71-80                     | 10       | 17.2                   | 5    | 33.3    |       |
|                                             | > 80                      | 5        | 8.6                    | 1    | 6.7     |       |
| Sex                                         | Female                    | 44       | 75.9                   | 10   | 66.7    | 0.516 |
|                                             | Male                      | 14       | 24.1                   | 5    | 33.3    |       |
| Number of additional drugs                  | ≤ 5                       | 45       | 77.6                   | 10   | 66.7    | 0.514 |
|                                             | 6-10                      | 9        | 15.5                   | 3    | 20.0    |       |
|                                             | > 10                      | 3        | 5.2                    | 2    | 13.3    |       |
|                                             | No answer                 | 1        | 1.7                    | 0    | 0.0     |       |
| Tumour entity                               | Breast cancer             | 21       | 36.2                   | 7    | 46.7    | 0.818 |
|                                             | Colorectal cancer         | 25       | 43.1                   | 7    | 46.7    |       |
|                                             | Gastric cancer            | 3        | 5.2                    | 0    | 0.0     |       |
|                                             | Oesophageal cancer        | 1        | 1.7                    | 1    | 6.7     |       |
|                                             | Ovarian cancer            | 3        | 5.2                    | 0    | 0.0     |       |
|                                             | Cancer of unknown primary | 1        | 1.7                    | 0    | 0.0     |       |
|                                             | Pancreatic cancer         | 3        | 5.2                    | 0    | 0.0     |       |
|                                             | Endometrial cancer        | 1        | 1.7                    | 0    | 0.0     |       |
| Therapy regimen at inclusion <sup>1,2</sup> | Cap                       | 35       | 60.3                   | 7    | 46.7    | 0.313 |
|                                             | Cap Beva                  | 11       | 19.0                   | 4    | 26.7    |       |
|                                             | Cap Beva Ox               | 1        | 1.7                    | 0    | 0.0     |       |
|                                             | Cap Lap                   | 1        | 1.7                    | 0    | 0.0     |       |
|                                             | Cap Ox                    | 3        | 5.2                    | 1    | 6.7     |       |
|                                             | Cap Vin                   | 1        | 1.7                    | 1    | 6.7     |       |
|                                             | Cap Mito                  | 0        | 0.0                    | 1    | 6.7     |       |
|                                             | Cap Trastu Ox             | 0        | 0.0                    | 1    | 6.7     |       |
|                                             | Cap Fulve                 | 2        | 3.4                    | 0    | 0.0     |       |
|                                             | Cap Vin Letro             | 1        | 1.7                    | 0    | 0.0     |       |
|                                             | Cap Trastu                | 3        | 5.2                    | 0    | 0.0     |       |
|                                             | Treatment intention       | curative | 8                      | 13.8 | 3       |       |
| palliative                                  |                           | 50       | 86.2                   | 12   | 80.0    |       |
| Classified time since diagnosis             | < ½ year                  | 15       | 25.9                   | 4    | 26.7    | 0.712 |
|                                             | ½ to 2 years              | 22       | 37.9                   | 4    | 26.7    |       |
|                                             | > 2 years                 | 21       | 36.2                   | 7    | 46.7    |       |
| Therapy setting                             | Oncology outpatient ward  | 51       | 87.9                   | 9    | 60.0    | 0.021 |
|                                             | Oncology practice         | 7        | 12.1                   | 6    | 40.0    |       |

<sup>1</sup> Therapy regimens: **Cap** = capecitabine monotherapy; **Cap Beva** = capecitabine + bevacizumab; **Cap Beva Ox** = capecitabine + bevacizumab + oxaliplatin; **Cap Lap** = capecitabine + lapatinib; **Cap Ox** = capecitabine + oxaliplatin; **Cap Vin** = capecitabine + vinorelbine; **Cap Mito** = capecitabine + mitomycin; **Cap Trastu Ox** = capecitabine + trastuzumab + oxaliplatin; **Cap Fulve** = capecitabine + fulvestrant; **Cap Vin Letro** = capecitabine + vinorelbine + letrozole; **Cap Trastu** = capecitabine + trastuzumab

<sup>2</sup> Bisphosphonate and radiation therapies are not considered

### Initially adherent patients

Initially adherent patients were observed for a median time of 119.0 days (range 21.0-152.0; IQR=69.8-126.0). During all observed cycles, a high percentage of these patients showed a daily adherence equal or greater 90% (Figure 2A). After the sixth cycle, 36 of 37 (97.3%, CI 88.8%-99.4%) initially adherent patients showed a daily adherence  $\geq 90\%$ . Since the CI does not include 75% it is shown with an error of the first kind of 5% that more than 75% of the initially adherent patients remained adherent after the modular medication management (without specific adherence support).

Figure 2B shows the same kind of data analysis for the daily intake adherence (excluding therapy-free interval). The fraction of initially adherent patients with a daily intake adherence  $\geq 90\%$  was lower compared to daily adherence reflecting that adherence is lower during intake than rest periods.

Figure 3 demonstrates that variability with regard to daily adherence increased from cycle 1 compared to further cycles. Median daily adherence was 100% in every cycle. Average daily adherence decreased from 98.9% in cycle 1 to 97.3% in cycle 6. Online table A provides more detailed information. Although initially adherent patients did not receive adherence support, the modular medication management led to a consistently high median daily adherence in a majority of these patients. Only in exceptional cases median daily adherence was observed to be lower than 90%. Individual daily adherence profiles of each patient over the observation period are provided in online figure A.

Online table A: Daily adherence of initially adherent patients (calculation based on intake and rest period)

|         | n  | Mean [%] | Median [%] | SD [%] | Range [%]  | IQR [%]     |
|---------|----|----------|------------|--------|------------|-------------|
| Cycle 1 | 58 | 98.9     | 100.0      | 2.1    | 93.3-100.0 | 100.0-100.0 |
| Cycle 2 | 56 | 97.3     | 100.0      | 5.5    | 66.7-100.0 | 95.2-100.0  |
| Cycle 3 | 48 | 97.2     | 100.0      | 4.9    | 75.0-100.0 | 95.2-100.0  |
| Cycle 4 | 45 | 96.7     | 100.0      | 6.3    | 68.8-100.0 | 95.2-100.0  |
| Cycle 5 | 40 | 97.4     | 100.0      | 4.7    | 80.0-100.0 | 95.2-100.0  |
| Cycle 6 | 37 | 97.3     | 100.0      | 7.3    | 57.1-100.0 | 95.2-100.0  |

### Initially non-adherent patients

Initially non-adherent patients were observed for a median time of 118.0 days (range 35.0-140.0; IQR=96.0-126.0). Figure 2A illustrates the percentage of patients who showed a daily adherence equal or greater than 90% during the different cycles. The results indicate a clear effect of adherence support. In cycle 2 the number of adherent patients was twice as high as in

cycle 1 and remained relatively constant in the later cycles. After completion of the sixth cycle, daily adherence of six out of eight (75.0%, CI 46.0%-91.3%) initially non-adherent patients accounted for  $\geq 90\%$ . Since the CI included 80% which was the cut-off value used for sample size determination of initially non-adherent patients, it could not be proven that  $>80\%$  of initially non-adherent patients were adherent after the intervention.

Figure 2B shows the percentage of initially non-adherent patients with a daily intake adherence  $\geq 90\%$  over the cycles. In contrast to the initially adherent patients, the fractions of initially non-adherent patients exhibiting a daily adherence  $\geq 90\%$  and a daily intake adherence  $\geq 90\%$  did not exhibit major differences.

Median daily adherence increased from 85.7% in cycle 1 to 97.6% in cycle 6, see figure 4. Average daily adherence accounted for 80.8% during the first cycle and was found to be greater than 90% during the application of the adherence support module (online table B). Adherence varied widely between patients but also from cycle to cycle in the same patients. Online figure B shows individual daily adherence profiles of initially non-adherent patients during the course of the study calculated for intake plus rest period.

Online table B: Daily adherence of initially non-adherent patients (calculation based on intake and rest period)

|         | n  | Mean [%] | Median [%] | SD [%] | Range [%]  | IQR [%]    |
|---------|----|----------|------------|--------|------------|------------|
| Cycle 1 | 15 | 80.8     | 85.7       | 17.6   | 28.6-92.9  | 85.0-90.5  |
| Cycle 2 | 15 | 93.7     | 95.2       | 8.8    | 71.4-100.0 | 95.0-100.0 |
| Cycle 3 | 13 | 90.7     | 95.2       | 13.6   | 59.1-100.0 | 90.5-100.0 |
| Cycle 4 | 12 | 92.1     | 95.2       | 7.0    | 76.2-100.0 | 90.5-95.2  |
| Cycle 5 | 12 | 92.7     | 95.2       | 7.2    | 79.2-100.0 | 88.1-97.6  |
| Cycle 6 | 8  | 90.5     | 97.6       | 15.1   | 57.1-100.0 | 85.7-100.0 |

### Potential predictors of adherence

There was no indication of an existing relationship between patients' daily adherence during the first cycle and their age (Spearman's  $r=0.009$ ,  $p=0.941$ ) or gender ( $p=0.891$ , Mann-Whitney-U test). In addition, there was not any significant association between daily adherence and any further socio-demographic and disease-related characteristics.

### Persistence

All study patients were persistent during the whole period they were prescribed capecitabine chemotherapy. No patient performed an unauthorised discontinuation of his capecitabine treatment.

1  
2  
3 However, in 17 of the 58 initially adherent patients capecitabine therapy was discontinued  
4 prematurely by the physicians. In 12 patients this decision was taken due to tumour progression.  
5 Further reasons for therapy discontinuation were adverse drug reactions (hand-foot syndrome  
6 and haemolytic anemia), hospital admission, the toxicity of a co-administered drug, and the  
7 patient's wish to stop treatment. 36 patients completed six cycles as planned, two patients  
8 completed less than six capecitabine cycles as planned, one patient died after the completion of  
9 the third cycle and two patients quit their study participation during the second cycle.  
10  
11  
12  
13

14 In five of 15 initially non-adherent patients capecitabine therapy was discontinued prematurely  
15 due to tumour progression. Eight patients completed six capecitabine cycles as planned, one  
16 patient completed five cycles as planned, and one patient died during the second cycle.  
17  
18  
19  
20  
21  
22  
23  
24  
25  
26  
27  
28  
29  
30  
31  
32  
33  
34  
35  
36  
37  
38  
39  
40  
41  
42  
43  
44  
45  
46  
47  
48  
49  
50  
51  
52  
53  
54  
55  
56  
57  
58  
59  
60

## DISCUSSION

In this study, we applied a systematic screening for non-adherent patients at an early stage of their capecitabine chemotherapy to provide a patient-tailored modular medication management. The results indicate that specific adherence support might improve adherence of initially non-adherent patients to capecitabine and that initially adherent patients' medication taking behaviour persists over time under basic pharmaceutical care and adverse event management.

### Sample size of initially non-adherent patients

A major limitation of our study is the relatively small number of initially non-adherent patients. Instead of the required sample size of 30 initially non-adherent patients, only 15 patients could be enrolled during the study period. Previous data suggested a distribution of 60% initially adherent and 40% initially non-adherent patients.<sup>25</sup> The actual distribution within our patient population was 80% to 20%. This has to be considered before interpreting data of the initially non-adherent patients. However, a clear trend towards an improved adherence over time was observed. Further multicenter studies are needed to provide better generalisable findings.

### Adherence screening

For the classification of patients as initially non-adherent or adherent, we used daily adherence of the first drug intake period plus the first day of the therapy-free interval assessed by MEMS®. Consideration of the whole capecitabine cycle would have provided a more complete picture of the participant's adherence during the first cycle. However, this was not feasible. To initiate adherence support before the start of cycle 2, an exact appointment on day 21 of the first cycle for group allocation would have been necessary. A belated start of the adherence supporting module would have biased the results of initially non-adherent patients.

Although our approach was suitable to discriminate between adhering and non-adhering patients it would be easier to identify non-adhering patients by means of possible predictors. With knowledge of adherence predictors a screening method without electronic monitoring could be developed, eg by a specific questionnaire. In general, numerous factors associated with non-adherence to oral anti-cancer drugs have been identified like eg side effects, forgetfulness, or disliking aspects of treatment.<sup>20 28</sup> On the basis of our data, it was not possible to derive significant information on adherence from socio-demographic or disease-related characteristics, eg age. Indeed, we observed that the three patients exhibiting the lowest baseline adherence during cycle 1 (28.6%, 57.1%, and 64.3%) were of a relatively old age (90, 75, and 79 years). However, from this result it cannot be concluded that adherence decreases with increasing age



1  
2  
3 as there were also elderly patients exhibiting high adherence. Our findings are in line with the  
4 findings of Partridge et al who did not find an association of adherence and age.<sup>21</sup> Furthermore,  
5 Bhattacharya et al did not identify significant associations between self-reported adherence to  
6 capecitabine and experience of side effects, beliefs about capecitabine, or satisfaction with  
7 information. However, the generalisability of that study was also limited by a relatively small  
8 sample size.<sup>24</sup> Therefore, larger multi-centre studies are necessary to identify precise predictors  
9 of non-adherence to capecitabine.  
10  
11  
12  
13

### 16 **Effect of modular medication management**

17  
18 Adherence rates in our study were higher than those reported by Partridge et al who found an  
19 average overall adherence measured by MEMS<sup>®</sup> (defined as the number of doses taken divided  
20 by the number of doses prescribed) between 70% to 80%.<sup>21</sup> Analysing our data the same way,  
21 overall adherence values ranged between 98.2% and 100.5% in initially adherent patients and  
22 between 93.8% and 102.7% in initially non-adherent patients. This might be explained by the  
23 fact that every participant of the present study received two medication management modules  
24 during all six cycles. In case of initially non-adherent patients, the provided adherence support  
25 might have increased adherence additionally. This finding is consistent with previous results  
26 from our working group. Under the provision of intensified pharmaceutical care to 48 breast and  
27 colorectal cancer patients, the intervention group showed an increased mean overall adherence  
28 in comparison to the control group.<sup>25</sup> In line with previous results<sup>21 25</sup>, non-persistence did not  
29 present a problem in our group of patients.  
30  
31  
32  
33  
34  
35  
36  
37  
38

### 39 **Daily adherence versus daily intake adherence**

40  
41 Daily adherence during the intake periods of each cycle was generally lower compared to daily  
42 adherence calculated on the basis of drug intake plus rest period. This implies that adherence to  
43 the regimen was better in the rest period when the drug should not be taken, i.e. not many  
44 patients took the drug by mistake. However, daily adherence calculated for the first intake  
45 interval plus the first day of the rest period in initially non-adherent patients was lower than  
46 daily adherence during the whole cycle or adherence during the intake interval alone. Eight of  
47 15 patients took capecitabine one day too long, too short or completely ignored the break. From  
48 this finding we conclude that special attention has to be paid to the change of drug intake to  
49 drug-free days in the first capecitabine cycle. Patients have to be educated in detail regarding  
50 this particularity of capecitabine treatment.  
51  
52  
53  
54  
55  
56  
57  
58  
59  
60

### Adherence management

Even though daily adherence could be improved in initially non-adherent patients, it has to be pointed out that this patient population did not reach the same adherence level as initially adherent patients. Moreover, inter-individual variability of adherence was higher. This finding suggests that a subgroup of patients with low adherence benefits from the adherence-enhancing intervention as suggested by Simons et al.<sup>25</sup> However, a certain number of patients cannot be reached and reveals a resistant medication taking behaviour. Reasons for intentional non-adherence in those patients were difficulties in swallowing tablets due to nausea and emesis caused by capecitabine (despite the provision of antiemetic prophylaxis and treatment), averseness to medication, or “compensating“ intake for previous non-adherence during treatment break. Unintentional non-adherence was mainly based on forgetfulness. Further research should include a systematic approach to develop strategies for adherence management in those ‘resistant’ patients.

### Conclusions

In summary, the results of this study demonstrate the potential of an early adherence screening for non-adherence and an individually applied modular medication management to use limited resources most efficiently. The provided adherence support improved adherence of initially non-adherent patients to oral chemotherapy. Moreover, the provision of basic pharmaceutical care and adverse event management was sufficient to maintain adherence in initially adherent patients for at least six cycles. The identification of potential predictors of adherence would facilitate the utilisation and broad application of the proposed adherence screening and modular medication management.

## Acknowledgements, Competing interests, Funding

**Acknowledgements:** We thank all patients who were willing to participate in our study. Furthermore, we thank Regina Moka as well as all oncologists and nurses who supported the conduction of our study.

**Funding:** A supplementary grant was provided by Roche, Basel. However, the researchers were entirely independent during all phases of this work.

**Competing interests:** All authors have completed the ICMJE uniform disclosure at [www.icmje.org/coi\\_disclosure.pdf](http://www.icmje.org/coi_disclosure.pdf) (available on request from the corresponding author) and declare that there have been no competing interests.

**Patient consent:** Obtained.

**Ethics approval:** This study was conducted with the approval of the ethics committee of the University of Bonn, Germany (consecutive number 042/09).

**Contributorship statement:** LK and UJ conceived the study design, substantially contributed to data analysis and interpretation, and drafted the manuscript. LK, YDK, PFS and CS were involved in the data collection and provision of multidisciplinary patient care. RF contributed substantially to statistical data analysis and interpretation. UJ is the guarantor. All authors critically reviewed the manuscript and gave their final approval for the version to be published.

**Provenance and peer review:** Not commissioned; externally peer reviewed.

**Data sharing statement:** Extra data is available by emailing Ulrich Jaehde ([u.jaehde@uni-bonn.de](mailto:u.jaehde@uni-bonn.de)).

All authors, external and internal, had full access to all of the data (including statistical reports and tables) in the study and can take responsibility for the integrity of the data and the accuracy of the data analysis.

**REFERENCES**

1. Findlay M, Minckwitz G von, Wardley A. Effective oral chemotherapy for breast cancer: pillars of strength. *Ann Oncol* 2008;**19**:212–22.
2. Weingart SN, Brown E, Bach PB, *et al*. NCCN Task Force Report: Oral chemotherapy. *J Natl Compr Canc Netw* 2008;**6**(Suppl 3):S1-14.
3. Halfdanarson TR, Jatoi A. Oral Cancer Chemotherapy: The Critical Interplay Between Patient Education and Patient Safety. *Curr Oncol Rep* 2010;**12**:247–52.
4. Schott S, Schneeweiss A, Reinhardt J, *et al*. Acceptance of oral chemotherapy in breast cancer patients - a survey study. *BMC Cancer* 2011;**11**:129.
5. Górnas M, Szczylik C. Oral treatment of metastatic breast cancer with capecitabine: what influences the decision-making process? *Eur J Cancer Care (Engl)* 2010;**19**:131–6.
6. Weingart SN, Flug J, Brouillard D, *et al*. Oral chemotherapy safety practices at US cancer centres: questionnaire survey. *BMJ* 2007;**334**:407.
7. Wood L. A review on adherence management in patients on oral cancer therapies. *Eur J Oncol Nurs* 2012;**16**:432–8.
8. Parsad SD, Ratain MJ. Prescribing oral chemotherapy. *BMJ* 2007;**334**:376.
9. Schneider SM, Hess K, Gosselin T. Interventions to Promote Adherence With Oral Agents. *Semin Oncol Nurs* 2011;**27**:133–41.
10. Cassidy J. First-line oral capecitabine therapy in metastatic colorectal cancer: a favorable safety profile compared with intravenous 5-fluorouracil/leucovorin. *Ann Oncol* 2002;**13**:566–75.
11. Walko CM, Lindley C. Capecitabine: a review. *Clin Ther* 2005;**27**:23–44.
12. Sabaté E. Adherence to Long-Term Therapies: Evidence for Action. Geneva: WHO; 2003.
13. Cutler DM, Everett W. Thinking outside the pillbox-medication adherence as a priority for health care reform. *N Engl J Med* 2010;**362**:1553–5.
14. Winterhalder R, Hoesli P, Delmore G, *et al*. Self-Reported Compliance with Capecitabine: Findings from a Prospective Cohort Analysis. *Oncology* 2011;**80**:29–33.
15. Ruddy K, Mayer E, Partridge A. Patient adherence and persistence with oral anticancer treatment. *CA Cancer J Clin* 2009;**59**:56–66.
16. Osterberg L, Blaschke T. Adherence to medication. *N Engl J Med* 2005;**353**:487–97.
17. Waterhouse DM, Calzone KA, Mele C, *et al*. Adherence to oral tamoxifen: a comparison of patient self-report, pill counts, and microelectronic monitoring. *J Clin Oncol* 1993;**11**:1189–97.

- 1  
2  
3 18. Haynes RB, McDonald HP, Garg AX. Helping patients follow prescribed treatment: clinical  
4 applications. *JAMA* 2002;**288**:2880–3.  
5  
6 19. Spoelstra SL, Given CW. Assessment and Measurement of Adherence to Oral  
7 Antineoplastic Agents. *Semin Oncol Nurs* 2011;**27**:116–32.  
8  
9 20. Foulon V, Schöffski P, Wolter P. Patient adherence to oral anticancer drugs: an emerging  
10 issue in modern oncology. *Acta Clin Belg* 2011;**66**:85–96.  
11  
12 21. Partridge AH, Archer L, Kornblith AB, *et al.* Adherence and persistence with oral adjuvant  
13 chemotherapy in older women with early-stage breast cancer in CALGB 49907: adherence  
14 companion study 60104. *J Clin Oncol* 2010;**28**:2418–22.  
15  
16 22. Muss HB, Berry DA, Cirincione CT, *et al.* Adjuvant Chemotherapy in Older Women with  
17 Early-Stage Breast Cancer. *N Engl J Med* 2009;**360**:2055–65.  
18  
19 23. Mayer EL, Partridge AH, Harris LN, *et al.* Tolerability of and adherence to combination oral  
20 therapy with gefitinib and capecitabine in metastatic breast cancer. *Breast Cancer Res Treat*  
21 2009;**117**:615–23.  
22  
23 24. Bhattacharya D, Easthall C, Willoughby KA, *et al.* Capecitabine non-adherence:  
24 Exploration of magnitude, nature and contributing factors. *J Oncol Pharm Pract* 2012;**18**:333–  
25 42.  
26  
27 25. Simons S, Ringsdorf S, Braun M, *et al.* Enhancing adherence to capecitabine chemotherapy  
28 by means of multidisciplinary pharmaceutical care. *Support Care Cancer* 2011;**19**:1009–18.  
29  
30 26. Cramer JA. Microelectronic systems for monitoring and enhancing patient compliance with  
31 medication regimens. *Drugs* 1995;**49**:321–7.  
32  
33 27. Denhaerynck K, Schäfer-Keller P, Young J, *et al.* Examining assumptions regarding valid  
34 electronic monitoring of medication therapy: development of a validation framework and its  
35 application on a European sample of kidney transplant patients. *BMC Med Res Methodol*  
36 2008;**8**:5.  
37  
38 28. Noens L, van Lierde M, Bock R de, *et al.* Prevalence, determinants, and outcomes of  
39 nonadherence to imatinib therapy in patients with chronic myeloid leukemia: the ADAGIO  
40 study. *Blood* 2009;**113**:5401–11.  
41  
42  
43  
44  
45  
46  
47  
48  
49  
50  
51  
52  
53  
54  
55  
56  
57  
58  
59  
60

**FIGURE AND TABLE LEGENDS**

Figure 1: Patient recruitment flow diagram

Figure 2: Percentage of patients exhibiting a **A** daily adherence  $\geq 90\%$  (during intake and rest periods) and a **B** daily intake adherence  $\geq 90\%$  (during the intake periods only)

Figure 3: Daily adherence of initially adherent patients during cycle 1 to 6

Figure 4: Daily adherence of initially non-adherent patients during cycle 1 to 6

Table 1: Socio-demographic and disease-related patient characteristics

Online figure A: Individual daily adherence of initially adherent patients during the course of the study; cycle 1: n=58, cycle 2: n=56, cycle 3: n=48, cycle 4: n=45, cycle 5: n=40, cycle 6: n=37, the black line represents median daily adherence

Online figure B: Individual daily adherence of initially non-adherent patients during the course of the study; cycle 1: n=15, cycle 2: n=15, cycle 3: n=13, cycle 4: n=12, cycle 5: n=12, cycle 6: n=8; the black line represents the median daily adherence

Online table A: Daily adherence of initially adherent patients (calculation based on intake and rest period)

Online table B: Daily adherence of initially non-adherent patients (calculation based on intake and rest period)

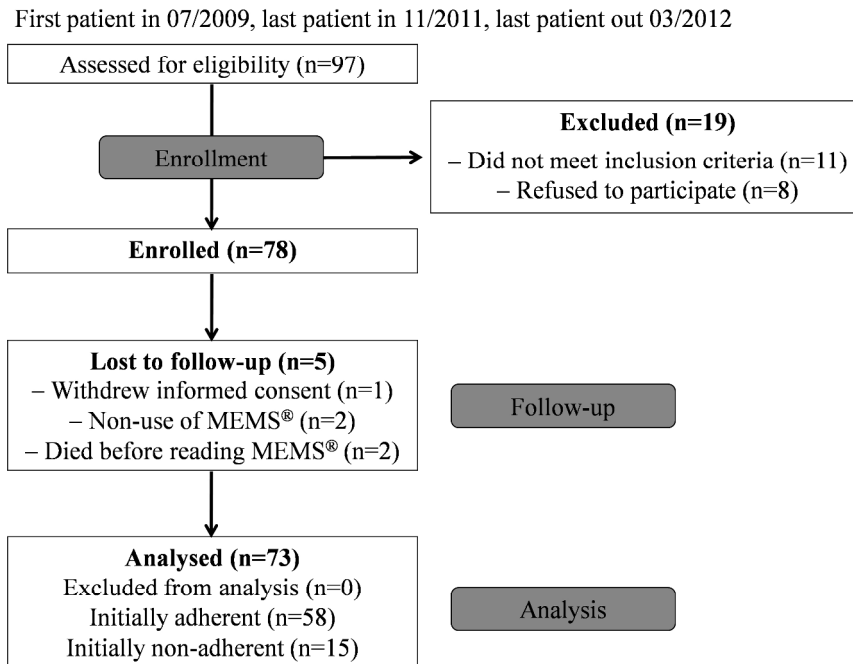

Fig. 1: Patient recruitment flow diagram  
254x190mm (300 x 300 DPI)

1  
2  
3  
4  
5  
6  
7  
8  
9  
10  
11  
12  
13  
14  
15  
16  
17  
18  
19  
20  
21  
22  
23  
24  
25  
26  
27  
28  
29  
30  
31  
32  
33  
34  
35  
36  
37  
38  
39  
40  
41  
42  
43  
44  
45  
46  
47  
48  
49  
50  
51  
52  
53  
54  
55  
56  
57  
58  
59  
60

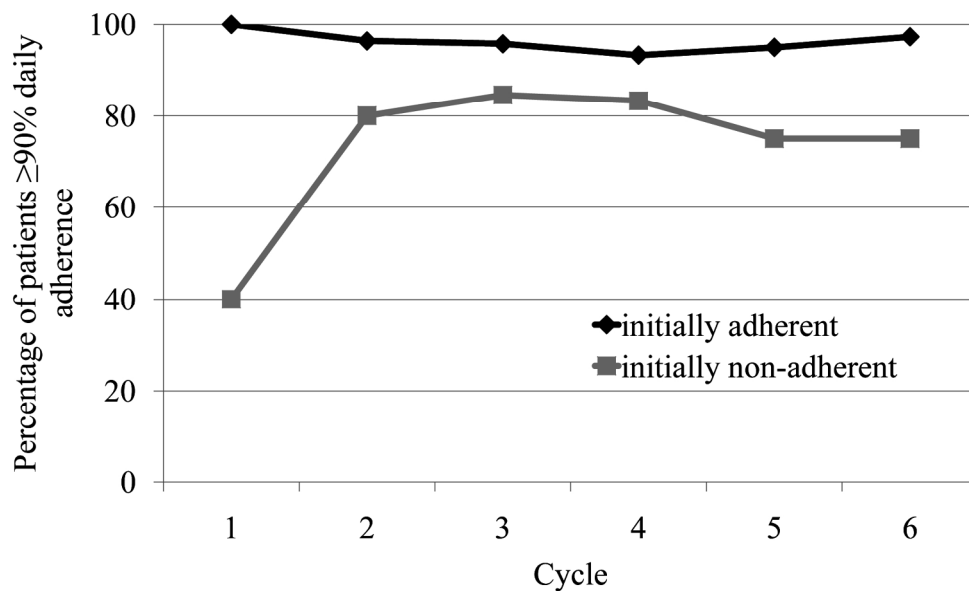

Fig. 2A: Percentage of patients exhibiting a daily adherence  $\geq 90\%$  (during intake and rest periods)  
180x109mm (300 x 300 DPI)

review only



1  
2  
3  
4  
5  
6  
7  
8  
9  
10  
11  
12  
13  
14  
15  
16  
17  
18  
19  
20  
21  
22  
23  
24  
25  
26  
27  
28  
29  
30  
31  
32  
33  
34  
35  
36  
37  
38  
39  
40  
41  
42  
43  
44  
45  
46  
47  
48  
49  
50  
51  
52  
53  
54  
55  
56  
57  
58  
59  
60

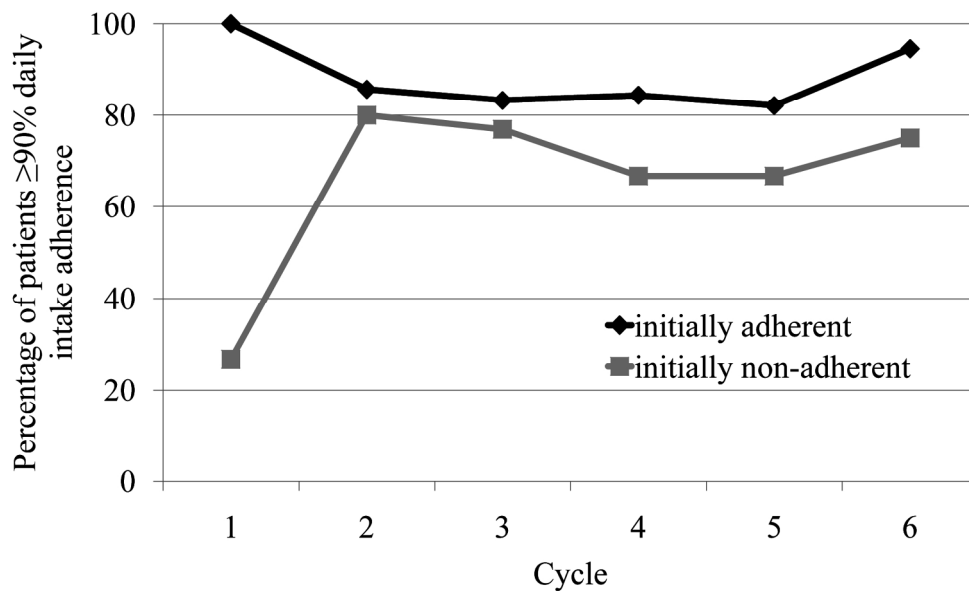

Fig. 2B: Percentage of patients exhibiting a daily intake adherence  $\geq 90\%$  (during the intake periods only)  
180x109mm (300 x 300 DPI)

review only

1  
2  
3  
4  
5  
6  
7  
8  
9  
10  
11  
12  
13  
14  
15  
16  
17  
18  
19  
20  
21  
22  
23  
24  
25  
26  
27  
28  
29  
30  
31  
32  
33  
34  
35  
36  
37  
38  
39  
40  
41  
42  
43  
44  
45  
46  
47  
48  
49  
50  
51  
52  
53  
54  
55  
56  
57  
58  
59  
60

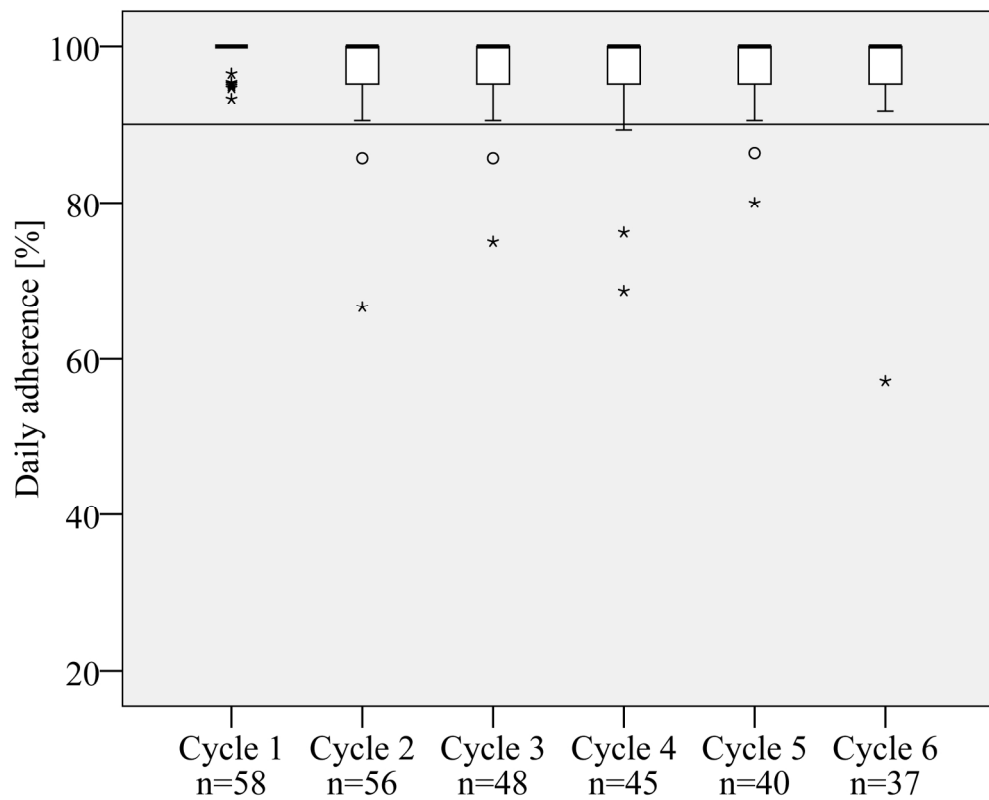

Fig. 3: Daily adherence of initially adherent patients during cycle 1 to 6  
158x127mm (300 x 300 DPI)

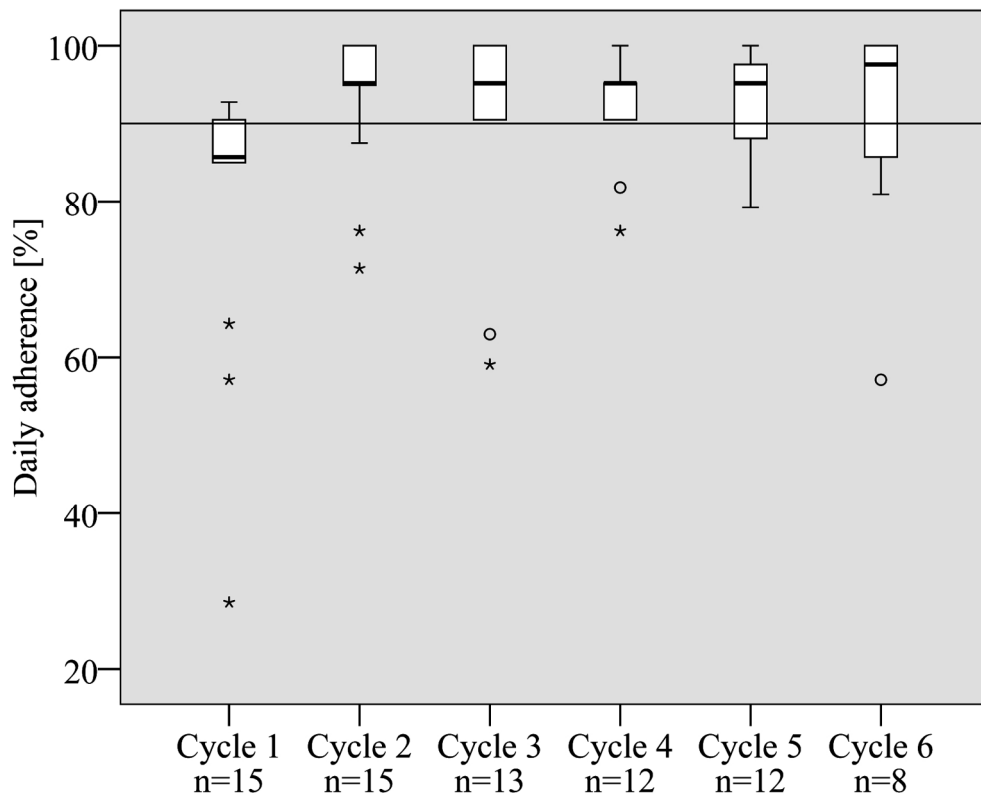

Fig. 4: Daily adherence of initially non-adherent patients during cycle 1 to 6  
158x127mm (300 x 300 DPI)

1  
2  
3  
4  
5  
6  
7  
8  
9  
10  
11  
12  
13  
14  
15  
16  
17  
18  
19  
20  
21  
22  
23  
24  
25  
26  
27  
28  
29  
30  
31  
32  
33  
34  
35  
36  
37  
38  
39  
40  
41  
42  
43  
44  
45  
46  
47  
48  
49  
50  
51  
52  
53  
54  
55  
56  
57  
58  
59  
60

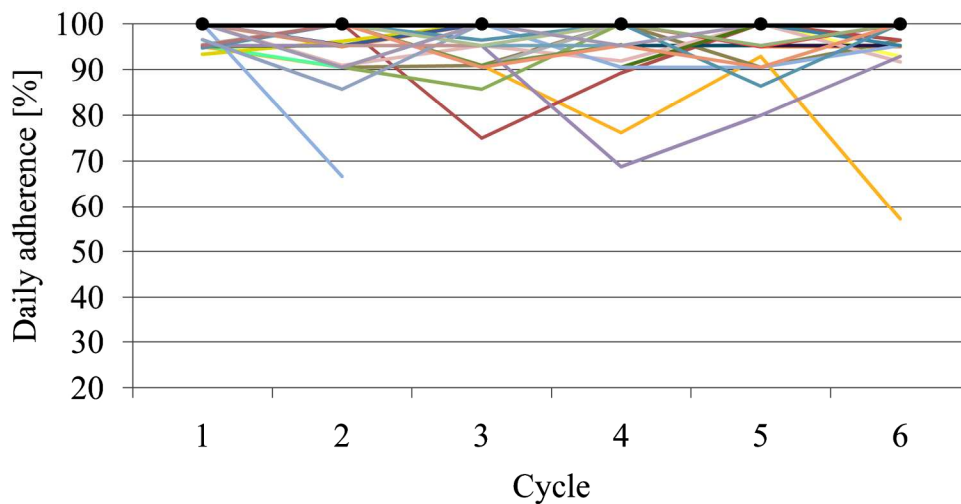

Online Fig. A: Individual daily adherence of initially adherent patients during the course of the study; cycle 1: n=58, cycle 2: n=56, cycle 3: n=48, cycle 4: n=45, cycle 5: n=40, cycle 6: n=37, the black line represents median daily adherence  
180x94mm (300 x 300 DPI)

review only

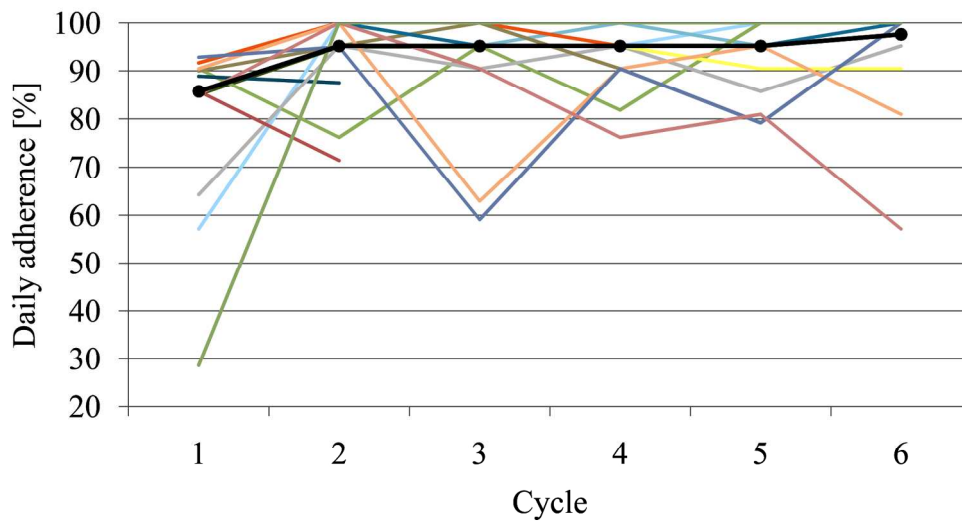

Online Fig. B: Individual daily adherence of initially non-adherent patients during the course of the study; cycle 1: n=15, cycle 2: n=15, cycle 3: n=13, cycle 4: n=12, cycle :5 n=12, cycle 6: n=8; the black line represents the median daily adherence  
180x97mm (300 x 300 DPI)

review only

**STROBE statement - checklist of items that should be included in reports of observational studies**

**Krolop et al.**

**Adherence management for cancer patients on capecitabine: a prospective two-arm cohort study**

|                              | Item No | Recommendation                                                                                                                                                                                                                                                                                                                                                                                                                                                         |                |
|------------------------------|---------|------------------------------------------------------------------------------------------------------------------------------------------------------------------------------------------------------------------------------------------------------------------------------------------------------------------------------------------------------------------------------------------------------------------------------------------------------------------------|----------------|
| <b>Title and abstract</b>    |         |                                                                                                                                                                                                                                                                                                                                                                                                                                                                        |                |
|                              | 1       | (a) Indicate the study's design with a commonly used term in the title or the abstract                                                                                                                                                                                                                                                                                                                                                                                 | OK             |
|                              |         | (b) Provide in the abstract an informative and balanced summary of what was done and what was found                                                                                                                                                                                                                                                                                                                                                                    | OK             |
| <b>Introduction</b>          |         |                                                                                                                                                                                                                                                                                                                                                                                                                                                                        |                |
| Background/rationale         | 2       | Explain the scientific background and rationale for the investigation being reported                                                                                                                                                                                                                                                                                                                                                                                   | OK             |
| Objectives                   | 3       | State specific objectives, including any prespecified hypotheses                                                                                                                                                                                                                                                                                                                                                                                                       | OK             |
| <b>Methods</b>               |         |                                                                                                                                                                                                                                                                                                                                                                                                                                                                        |                |
| Study design                 | 4       | Present key elements of study design early in the paper                                                                                                                                                                                                                                                                                                                                                                                                                | OK             |
| Setting                      | 5       | Describe the setting, locations, and relevant dates, including periods of recruitment, exposure, follow-up, and data collection                                                                                                                                                                                                                                                                                                                                        | OK             |
| Participants                 | 6       | (a) <i>Cohort study</i> —Give the eligibility criteria, and the sources and methods of selection of participants. Describe methods of follow-up<br><i>Case-control study</i> —Give the eligibility criteria, and the sources and methods of case ascertainment and control selection. Give the rationale for the choice of cases and controls<br><i>Cross sectional study</i> —Give the eligibility criteria, and the sources and methods of selection of participants | OK             |
|                              |         | (b) <i>Cohort study</i> —For matched studies, give matching criteria and number of exposed and unexposed<br><i>Case-control study</i> —For matched studies, give matching criteria and the number of controls per case                                                                                                                                                                                                                                                 | Not applicable |
| Variables                    | 7       | Clearly define all outcomes, exposures, predictors, potential confounders, and effect modifiers. Give diagnostic criteria, if applicable                                                                                                                                                                                                                                                                                                                               | OK             |
| Data sources/<br>measurement | 8*      | For each variable of interest, give sources of data and details of methods of assessment (measurement). Describe comparability of assessment methods if there is more than one group                                                                                                                                                                                                                                                                                   | OK             |
| Bias                         | 9       | Describe any efforts to address potential sources of                                                                                                                                                                                                                                                                                                                                                                                                                   | Not            |

|                        |     | bias                                                                                                                                                                                                                                                                                                      | applicable     |
|------------------------|-----|-----------------------------------------------------------------------------------------------------------------------------------------------------------------------------------------------------------------------------------------------------------------------------------------------------------|----------------|
| Study size             | 10  | Explain how the study size was arrived at                                                                                                                                                                                                                                                                 | OK             |
| Quantitative variables | 11  | Explain how quantitative variables were handled in the analyses. If applicable, describe which groupings were chosen and why                                                                                                                                                                              | OK             |
| Statistical methods    | 12  | (a) Describe all statistical methods, including those used to control for confounding                                                                                                                                                                                                                     | OK             |
|                        |     | (b) Describe any methods used to examine subgroups and interactions                                                                                                                                                                                                                                       | OK             |
|                        |     | (c) Explain how missing data were addressed                                                                                                                                                                                                                                                               | OK             |
|                        |     | (d) <i>Cohort study</i> —If applicable, explain how loss to follow-up was addressed<br><i>Case-control study</i> —If applicable, explain how matching of cases and controls was addressed<br><i>Cross sectional study</i> —If applicable, describe analytical methods taking account of sampling strategy | Not applicable |
|                        |     | (e) Describe any sensitivity analyses                                                                                                                                                                                                                                                                     | Not applicable |
| <b>Results</b>         |     |                                                                                                                                                                                                                                                                                                           |                |
| Participants           | 13* | (a) Report numbers of individuals at each stage of study—eg numbers potentially eligible, examined for eligibility, confirmed eligible, included in the study, completing follow-up, and analysed                                                                                                         | OK             |
|                        |     | (b) Give reasons for non-participation at each stage                                                                                                                                                                                                                                                      | OK             |
|                        |     | (c) Consider use of a flow diagram                                                                                                                                                                                                                                                                        | OK             |
| Descriptive data       | 14* | (a) Give characteristics of study participants (eg demographic, clinical, social) and information on exposures and potential confounders                                                                                                                                                                  | OK             |
|                        |     | (b) Indicate number of participants with missing data for each variable of interest                                                                                                                                                                                                                       | OK             |
|                        |     | (c) <i>Cohort study</i> —Summarise follow-up time (eg average and total amount)                                                                                                                                                                                                                           | OK             |
| Outcome data           | 15* | <i>Cohort study</i> —Report numbers of outcome events or summary measures over time                                                                                                                                                                                                                       | OK             |
|                        |     | <i>Case-control study</i> —Report numbers in each exposure category, or summary measures of exposure                                                                                                                                                                                                      | -              |
|                        |     | <i>Cross sectional study</i> —Report numbers of outcome events or summary measures                                                                                                                                                                                                                        | -              |
| Main results           | 16  | (a) Give unadjusted estimates and, if applicable,                                                                                                                                                                                                                                                         | Not            |

|                          |    |                                                                                                                                                                            |                |
|--------------------------|----|----------------------------------------------------------------------------------------------------------------------------------------------------------------------------|----------------|
|                          |    | confounder adjusted estimates and their precision (eg 95% confidence interval). Make clear which confounders were adjusted for and why they were included                  | applicable     |
|                          |    | (b) Report category boundaries when continuous variables were categorised                                                                                                  | OK             |
|                          |    | (c) If relevant, consider translating estimates of relative risk into absolute risk for a meaningful time period.                                                          | Not applicable |
| Other analyses           | 17 | Report other analyses done—eg analyses of subgroups and interactions, and sensitivity analyses                                                                             | OK             |
| <b>Discussion</b>        |    |                                                                                                                                                                            |                |
| Key results              | 18 | Summarise key results with reference to study objectives                                                                                                                   | OK             |
| Limitations              | 19 | Discuss limitations of the study, taking into account sources of potential bias or imprecision. Discuss both direction and magnitude of any potential bias                 | OK             |
| Interpretation           | 20 | Give a cautious overall interpretation of results considering objectives, limitations, multiplicity of analyses, results from similar studies, and other relevant evidence | OK             |
| Generalisability         | 21 | Discuss the generalisability (external validity) of the study results                                                                                                      | OK             |
| <b>Other information</b> |    |                                                                                                                                                                            |                |
| Funding                  | 22 | Give the source of funding and the role of the funders for the present study and, if applicable, for the original study on which the present article is based              | OK             |



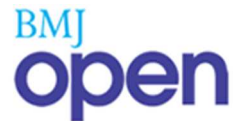

**Adherence management for cancer patients on capecitabine: a prospective two-arm cohort study**

|                                 |                                                                                                                                                                                                                                                                                                                                                                             |
|---------------------------------|-----------------------------------------------------------------------------------------------------------------------------------------------------------------------------------------------------------------------------------------------------------------------------------------------------------------------------------------------------------------------------|
| Journal:                        | <i>BMJ Open</i>                                                                                                                                                                                                                                                                                                                                                             |
| Manuscript ID:                  | bmjopen-2013-003139.R1                                                                                                                                                                                                                                                                                                                                                      |
| Article Type:                   | Research                                                                                                                                                                                                                                                                                                                                                                    |
| Date Submitted by the Author:   | 28-May-2013                                                                                                                                                                                                                                                                                                                                                                 |
| Complete List of Authors:       | Krolop, Linda; University of Bonn, Clinical Pharmacy<br>Ko, Yon-Dschun; Johanniter Hospital, Internal Medicine<br>Schwindt, Peter; Oncology Practice,<br>Schumacher, Claudia; St. Elisabeth Hospital, Breast Unit/Senology<br>Fimmers, Rolf; University of Bonn, Medical Biometry, Informatics and<br>Epidemiology<br>Jaehde, Ulrich; University of Bonn, Clinical Pharmacy |
| <b>Primary Subject Heading</b>: | Oncology                                                                                                                                                                                                                                                                                                                                                                    |
| Secondary Subject Heading:      | Health services research, Medical management, Patient-centred medicine,<br>Pharmacology and therapeutics                                                                                                                                                                                                                                                                    |
| Keywords:                       | Quality in health care < HEALTH SERVICES ADMINISTRATION &<br>MANAGEMENT, Organisation of health services < HEALTH SERVICES<br>ADMINISTRATION & MANAGEMENT, Adult oncology < ONCOLOGY                                                                                                                                                                                        |
|                                 |                                                                                                                                                                                                                                                                                                                                                                             |

SCHOLARONE™  
Manuscripts

only

1  
2  
3 **Adherence management for cancer patients on capecitabine: a**  
4 **prospective two-arm cohort study**  
5  
6

7 Linda Krolop, Yon-Dschun Ko, Peter Florian Schwindt, Claudia Schumacher, Rolf Fimmers,  
8 Ulrich Jaehde  
9

10  
11  
12 Institute of Pharmacy, Clinical Pharmacy, University of Bonn, An der Immenburg 4, 53121  
13 Bonn, Germany Linda Krolop pharmacist; Internal Medicine, Johanniter Hospital,  
14 Johanniterstrasse 3-5, 53113 Bonn, Germany Yon-Dschun Ko professor of internal medicine;  
15 Oncology Practice, Straesschensweg 16, 53113 Bonn, Germany Peter Florian Schwindt  
16 oncologist; Specialist Breast Unit / Senology, St. Elisabeth Hospital Cologne-Hohenlind,  
17 Werthmannstraße 1, 50935 Cologne, Germany Claudia Schumacher senior physician; Institute  
18 for Medical Biometry, Informatics and Epidemiology, University of Bonn, Sigmund-Freud-Str.  
19 25, 53127 Bonn, Germany Rolf Fimmers statistician; Institute of Pharmacy, Clinical Pharmacy,  
20 University of Bonn, An der Immenburg 4, 53121 Bonn, Germany Ulrich Jaehde professor of  
21 clinical pharmacy  
22  
23  
24  
25  
26  
27  
28  
29

30 Correspondence to: Prof. Dr. Ulrich Jaehde, u.jaehde@uni-bonn.de, Tel: +49-228-73-5252, Fax:  
31 +49-228-73-9757  
32  
33  
34  
35

36 Key words: adherence, compliance, capecitabine, pharmaceutical care, oral chemotherapy  
37

38 Word count: 4,308  
39  
40  
41  
42  
43  
44  
45  
46  
47  
48  
49  
50  
51  
52  
53  
54  
55  
56  
57  
58  
59  
60

## ARTICLE SUMMARY

### Article Focus

- Adequate patient adherence to capecitabine, an orally administered prodrug of fluorouracil, is essential for treatment success. The early identification of potential non-adherers followed by adherence-enhancing measures may contribute to the effectiveness of oral anticancer drug therapy.
- This prospective, multi-centred observational cohort study aimed to develop and evaluate a multiprofessional medication management to assure adherence to capecitabine.
- It was hypothesized that adherence of initially adherent patients ( $\geq 90\%$  adherence during the first cycle) would remain high over time without specific support and that initially non-adherent patients ( $< 90\%$  adherence during the first cycle) would benefit from specific adherence support.

### Key Messages

- An early adherence screening effectively distinguishes between patients adhering and non-adhering to capecitabine.
- The provision of specific adherence support is associated with enhanced adherence of initially non-adherent patients.
- Initially adherent patients remain adherent for at least six cycles without specific support implying that targeted support to those patients who benefit from it is a reasonable approach.

### Strengths and Limitations

- Our approach is multiprofessional and needs-based utilising available resources for adherence management most efficiently.
- The relatively small sample size of initially non-adherent patients limits the validity of the observed results for this subgroup of patients.

## ABSTRACT

**Background:** Capecitabine, an orally administered prodrug of fluorouracil, is administered twice daily for two weeks followed by one week off. Adequate patient adherence is essential for treatment success. The early identification of potential non-adherers followed by adherence-enhancing measures may contribute to the effectiveness of oral anticancer drug therapy.

**Objective:** To develop and evaluate a multiprofessional modular medication management to assure adherence to capecitabine.

**Methods:** The study was conducted as a prospective, multi-centred observational cohort study. All participants received pharmaceutical care consisting of oral and written information. Daily adherence was defined as percentage of days with correctly administered capecitabine doses and assessed using electronic monitoring (MEMS®). According to their daily adherence during the first cycle, patients were identified as initially non-adherent (<90% adherence) or adherent (≥90% adherence). Initially non-adherent patients received additional adherence support.

**Results:** Seventy-three patients with various tumour entities were enrolled, 58 were initially adherent and 15 non-adherent. Median daily adherence of initially non-adherent patients increased from 85.7% to 97.6% during the observation period of six cycles. Throughout all cycles, median daily adherence of initially adherent patients was 100.0%. Daily adherence was not associated with socio-demographic and disease-related factors. No patient was non-persistent.

**Conclusions:** An early adherence screening effectively distinguishes between patients adhering and non-adhering to capecitabine. The provision of specific adherence support is associated with enhanced adherence of initially non-adherent patients, whereas initially adherent patients remain adherent for at least six cycles without specific support. Our needs-based approach helps to use available resources for adherence management efficiently.

## INTRODUCTION

Cancer therapy has traditionally been dominated by intravenously administered agents.<sup>1</sup> However, oral anti-cancer drugs are increasingly used and more than one-quarter of all anti-cancer drugs currently under development are orally administered.<sup>2,3</sup> Oral anti-cancer therapies are highly accepted by patients based on obvious advantages, e.g. higher convenience, avoidance of venipuncture and paravasates, and greater patient autonomy.<sup>2,4,5</sup> However, these treatments are also associated with many challenges. Due to less intense contact between patient and health care providers, responsibilities in terms of managing the course of treatment are transferred to the patient such as monitoring of doses and toxicity.<sup>2,6</sup> In contrast to intravenously administered anti-cancer treatments, health care providers cannot always assume that patients are adherent which is, however, the key prerequisite for treatment success. Multidisciplinary patient care and specific patient education regarding all aspects of the treatment regimen are crucial to maintain adherence.<sup>6-9</sup>

Patients of the present study were treated with the chemotherapeutic agent capecitabine, an orally administered prodrug of cytotoxic fluorouracil (5 FU). Capecitabine has an improved tolerability and comparable efficacy compared with infusional or bolus 5 FU<sup>10</sup> and is frequently used in the treatment of breast, colorectal, and gastric cancer. Moreover, ovarian, pancreatic, or oesophageal tumours may be treated with capecitabine. One capecitabine cycle consists of three weeks, two weeks of twice daily drug intake followed by seven days of break.<sup>11</sup>

Patient adherence to prescribed treatment regimens for chronic non-oncologic diseases accounts for 50% on average only.<sup>12,13</sup> Cancer patients' medication taking behaviour is presumed to be particularly adherent, since cancer is a life-threatening disease.<sup>14-18</sup> However, adherence rates of oral anti-cancer agents were reported to range from 16% to 100% depending on the drug and method of measurement.<sup>15</sup> Exact measurement of adherence is a challenge and existing methods are limited for various reasons.<sup>19</sup> Best estimation of adherence may be provided by electronic monitoring such as the medication event monitoring system (MEMS®).<sup>20</sup>

Several studies have been published investigating patient adherence to capecitabine. Partridge et al used MEMS® for adherence assessment in older women with early-stage breast cancer. Adherence was defined as the number of doses taken divided by the doses expected. 75% of the included patients were regarded as adherent, i.e. they performed more than 80% of the expected openings. Mean adherence accounted for 78% across all cycles.<sup>21,22</sup> Winterhalder et al used participant self-reports to explore adherence in gastrointestinal and breast cancer patients. Any violation of the recommended treatment regimen, according to their diary entries, during the duration of the capecitabine treatment was considered as non-adherence. 91% (161/177) patients were found to be fully adherent, whereas only 9% (16/177) reported some kind of adherence error.<sup>14</sup> The adherence of 13 younger metastatic breast cancer patients was assessed using

1  
2  
3 MEMS<sup>®</sup> and the median accounted for 96%. Adherence was defined as observed doses divided  
4 by expected doses. Self-reported adherence was assessed additionally and the median was 97%  
5 (n=12).<sup>23</sup> Self-reported non-adherence of 43 breast and colorectal cancer patients was 23.3%.<sup>24</sup>  
6  
7 Furthermore, the effect of an intensified multidisciplinary pharmaceutical care programme  
8 consisting of a combination of written and spoken information on the adherence of cancer  
9 patients treated with capecitabine was investigated. Adherence was measured using MEMS<sup>®</sup>  
10 and defined as the percentage of days with correct medication taking behaviour. Patients who  
11 received pharmaceutical care showed a significantly higher mean daily adherence compared to  
12 the control group who received standard care (96.8% vs 87.2%, p=0.029).<sup>25</sup>  
13  
14  
15  
16

17 Thus, adherence rates of patients treated with capecitabine are relatively high compared to non-  
18 oncologic oral drugs but can still be increased by specific measures.<sup>25</sup> Conversely, this implies  
19 that only some patients treated with capecitabine are in need of an adherence-enhancing  
20 intervention and the limited resources could be used more efficiently. Certain patients manage  
21 their oral treatment regimen independently and do not benefit from specialized patient care.  
22 Therefore, we chose a modular medication management approach in this study. Cancer patients  
23 were screened for their adherence during their first capecitabine cycle to detect potential non-  
24 adherers. Initially adherent as well as non-adherent patients received basic pharmaceutical care  
25 and adverse event management. Specific adherence support was only applied to initially non-  
26 adherent patients.  
27  
28  
29  
30  
31

32 According to the recently published taxonomy for describing and defining adherence to  
33 medications<sup>26</sup>, this study primarily addressed the implementation element of adherence. The aim  
34 was to identify initially non-adherent patients and to investigate initially non-adherent and  
35 initially adherent patients' adherence over time. It was hypothesized that adherence of initially  
36 adherent patients would remain high over time without specific support and that initially non-  
37 adherent patients would benefit from specific adherence support.  
38  
39  
40  
41  
42  
43  
44  
45  
46  
47  
48  
49  
50  
51  
52  
53  
54  
55  
56  
57  
58  
59  
60

## METHODS

### Study design

The study was conducted as a prospective, multi-centred, two-arm observational cohort study. One study arm consisted of patients classified as initially adherent (baseline daily adherence  $\geq 90\%$ ), the other arm of initially non-adherent patients (baseline daily adherence  $< 90\%$ ).

### Study setting and sample

The study was conducted in two oncology outpatient wards and one oncology practice. Data were collected between July 2009 and March 2012. After the identification of eligibility by the collaborating oncologists, the study pharmacist asked the patients if they were willing to participate in the study. In case of acceptance, each participant signed a written informed consent. The study protocol considered a maximum observation period of six capecitabine cycles for every participant. The main inclusion criterion was the initiation of chemotherapy with capecitabine as single agent or combination therapy for treatment of cancer. Patients had to be capecitabine-naïve, at least 18 years old and able to speak, read and write German. Inclusion had to take place within two weeks after initiation of capecitabine treatment. Exclusion criteria implied any diagnosis of a disease or mental state compromising full understanding of purpose and course of the study. The ethics committee of the University of Bonn, Germany voted positively for this study.

### Adherence measurement

Adherence to capecitabine treatment was assessed using the Medication Event Monitoring System (MEMS<sup>®</sup>, Aardex Group Ltd., Zug, Switzerland).<sup>27</sup> Every participant was provided with a MEMS<sup>®</sup> container and asked to use it for storage of capecitabine medication during study participation. For ethical reasons patients were informed about the fact that their adherence was being monitored. The caps of the MEMS<sup>®</sup> containers recorded date and time of every opening. Patients were instructed to open the containers only when taking their capecitabine dose. In case of required refills, patients were requested to schedule refill and regular capecitabine intake at the same time in order to avoid additional openings. If this was not possible or in case of further extraordinary openings, patients were asked to note the respective information on a special documentation sheet. Since uncensored MEMS<sup>®</sup> data might overestimate non-adherence<sup>28</sup>, adherence data were censored according to information derived from notes and interviews (e.g. exclusion of self-reported non-monitoring intervals or extra openings, and intake of doses taken

1  
2  
3 from another source than MEMS<sup>®</sup>). Measurement ended after six completed capecitabine cycles  
4 or in case of premature treatment discontinuation.  
5  
6  
7

### 8 **Adherence analysis**

9  
10 Adherence was studied using medication taking profiles uploaded from the MEMS<sup>®</sup> monitors  
11 and patients' information concerning extraordinary incidents. 'Daily adherence' was selected as  
12 primary endpoint. It was defined as percentage of days with correctly administered capecitabine  
13 doses (number of days with correct drug intake divided by number of observed days). In the  
14 case of missing MEMS<sup>®</sup> data the corresponding days were not included in the analysis, i.e. the  
15 number of observed days was reduced accordingly. Adherence was assessed on days with drug  
16 intake as well as days during the rest period. A day was considered as adherent only, if two  
17 openings of the MEMS<sup>®</sup> monitor were recorded on a day during the drug intake period (dosing  
18 interval  $\geq 6$  hours) or if no openings were recorded during the rest period.  
19  
20

21 Different measures of adherence were used. 'Daily adherence' was calculated for every  
22 individual cycle on the basis of days with and without drug intake. Furthermore, 'daily intake  
23 adherence' was calculated for every individual cycle on the basis of the drug intake interval  
24 only. This was done in order to exclude the influence of the intake-free interval on the  
25 adherence. Additionally, 'persistence' of drug intake was analysed. Duration of physician's  
26 capecitabine prescription was compared with the duration of the actual treatment by the  
27 participant.  
28  
29

30 For the classification of a participant as initially adherent or non-adherent, daily adherence was  
31 calculated for the intake period of the first cycle plus first day of the therapy-free interval. This  
32 parameter is referred to as 'baseline daily adherence'. A participant was classified as initially  
33 adherent (baseline daily adherence  $\geq 90\%$ ) or initially non-adherent (baseline daily adherence  
34  $< 90\%$ ). Since no consensual standard for the definition of sufficient adherence exists<sup>16</sup>, the  
35 threshold of 90% was defined empirically based on the results of an earlier research project<sup>25</sup>. If  
36 assessment of baseline adherence resulted in a participant being initially non-adherent,  
37 adherence support was provided before the start of the second intake period.  
38  
39  
40  
41  
42  
43  
44  
45  
46  
47  
48  
49

### 50 **Modular medication management**

51 In addition to standard care provided by physicians and nurses of the respective study centre,  
52 medication management consisted of three modules. A detailed literature search was conducted  
53 to identify most valuable components of pharmaceutical care and adherence enhancement. On  
54 the basis of the reviewed literature the modules were developed, discussed and adapted. Every  
55 study participant received module 1 (basic pharmaceutical care) as well as module 2 (adverse  
56  
57  
58  
59  
60



1  
2  
3 event management). These modules were provided by a registered pharmacist of the  
4 Department of Clinical Pharmacy at the University of Bonn, Germany, in collaboration with the  
5 attending physicians and nurses. If a participant was initially non-adherent, the pharmacist  
6 delivered module 3 (adherence support) to the patient additionally.  
7  
8

9  
10 Modules 1 and 2 were initiated after inclusion. Module 1 implied detailed medication history  
11 taking to perform drug-drug interaction checks and compile an individual medication plan. In  
12 case of identified drug-related problems, necessary changes of the medication were made in  
13 collaboration with the responsible physician. Patients were educated in detail about the  
14 cytotoxic agent capecitabine, its mechanism of action and the individual dosing regimen.  
15 Further anti-cancer agents, supportive therapy and other agents taken regularly were also  
16 addressed. Patient counselling was supported by the provision of written information material.  
17 Within module 2, patients were educated regarding common adverse effects (eg, hand-foot  
18 syndrome and diarrhoea). Prophylaxis, detection and treatment of adverse effects were discussed  
19 in detail. If patients took other drugs or were prescribed a concomitant anti-cancer treatment,  
20 they were counselled regarding the adverse effects of these drugs as well. An information  
21 brochure regarding prevention and management of adverse effects caused by chemotherapy  
22 supported oral counselling.  
23  
24  
25  
26  
27  
28

29  
30 Since feeding back to the patients electronically compiled adherence data has been  
31 demonstrated to be an effective approach to enhance adherence<sup>29</sup>, module 3 contained a detailed  
32 discussion of the patient's individual adherence results on the basis of cycle 1 MEMS<sup>®</sup> data.  
33 Adherence support focussed on the identification of reasons for non-adherence to define a  
34 feasible adherence-enhancing strategy. Since various types of non-adherence exist, strategies to  
35 overcome individual barriers to adherence were designed individually. Strategies to improve  
36 unintentional non-adherence (eg due to forgetfulness) included treatment diaries or linking drug  
37 intake with a certain act of daily routine (cue dosing). In contrast, intentional non-adherence had  
38 to be approached in a completely different manner. If an adverse effect was the reason for not  
39 taking capecitabine, management and prevention of further adverse effects were addressed in  
40 accordance with module 2. Patients' expectations and experiences were included in all  
41 considerations. Moreover, an increase of the patient's awareness of the importance of adherence  
42 with capecitabine treatment was aimed. Routinely, beginning and end of the current and next  
43 capecitabine cycle were explicitly discussed. The content and course of the adherence-  
44 supporting session was adapted according to the patients' medication taking behaviour. If the  
45 participant showed a daily adherence <90%, the content of the first counselling session of  
46 module 3 was repeated and adherence-enhancing strategies were reassessed, discussed and  
47 adapted.  
48  
49  
50  
51  
52  
53  
54  
55  
56  
57  
58  
59  
60

1  
2  
3 Personal follow-up visits took place at least once every cycle. Between scheduled appointments  
4 every participant had the possibility to reach individual advice in person, by telephone or by  
5 email.  
6  
7  
8  
9

### 10 **Sample size calculation and statistical analysis**

11 Sample size calculations were based on one-sided exact binomial tests and conducted for the  
12 primary endpoint 'daily adherence'. Available adherence data<sup>25</sup> was analysed with regard to  
13 daily adherence of the participant's first capecitabine cycle. Regarding initially adherent patients  
14 a sample size of 45 was required to show with a power (1- $\beta$ ) of 80% that >75% of these patients  
15 remain being adherent (type I error( $\alpha$ ) = 5%). The true population value of patients who persist  
16 being adherent was assumed to account for >90%. Regarding initially non-adherent patients, a  
17 sample size of 30 patients was required to show with a power (1- $\beta$ ) of 80% that >80% of these  
18 patients become adherent after the adherence support (type I error ( $\alpha$ ) = 5%). The true  
19 population value of patients who became adherent was assumed to account for >95%. Finally a  
20 dropout rate of 20% was estimated so that a total sample size of 90 patients resulted (54 initially  
21 adherent and 36 initially non-adherent patients). Data entry and statistical data analysis were  
22 carried out using Excel<sup>®</sup> 2007 (Microsoft, Redmond, USA) and SPSS<sup>®</sup> Version 20 (SPSS<sup>®</sup> Inc.,  
23 Chicago, USA, Statistical Package for the Social Sciences). Appropriate descriptive statistics  
24 was used to characterise the patient population and summarise the study results. Data were  
25 mostly binary, nominal, ordinal, or failed to follow a normal distribution, thus non-parametric  
26 testing was utilised consistently. Differences regarding socio-demographic and disease-related  
27 characteristics between initially adherent and non-adherent patients were tested using the  
28 Fisher's exact test for nominal data. To explore the relationship between adherence and  
29 potential predictors of adherence, Spearman's rank correlation coefficient was used for  
30 comparing two continuous data sets and Mann-Whitney-U analysis was used for comparing  
31 continuous (not normally distributed) data with binary data sets.  
32  
33  
34  
35  
36  
37  
38  
39  
40  
41  
42  
43  
44  
45  
46  
47  
48  
49  
50  
51  
52  
53  
54  
55  
56  
57  
58  
59  
60

## RESULTS

During the data collection period participating oncologists assessed in total 97 patients for eligibility, 78 were enrolled in the study. Figure 1 provides a detailed overview of patient recruitment including reasons for exclusion and loss to follow-up. The main reason (seven out of eight refusals) for non-participation was perceived stress by the study in addition to their mentally and/or physically impaired condition. Since five patients were not capecitabine-naïve, two patients were not able to speak, read and write German and for four patients MEMS<sup>®</sup> use was not possible due to participation in another trial, they were not enrolled.

### Patient characteristics

Seventy-three patients were analysed for baseline daily adherence, 58 (79.5%) were initially adherent and 15 (20.5%) initially non-adherent. Table 1 shows that there was no statistically significant difference between initially adherent and non-adherent patients regarding socio-demographic and disease-related characteristics. However, there was a significant difference in the therapy setting ( $p=0.021$ , Fisher's exact test).

Table 1: Socio-demographic and disease-related patient characteristics

| Socio-demographic characteristics                | initially adherent        |     | initially non-adherent |     | P value |       |
|--------------------------------------------------|---------------------------|-----|------------------------|-----|---------|-------|
|                                                  | n                         | %   | n                      | %   |         |       |
| Classified age [years]                           | ≤ 50                      | 11  | 19.0                   | 0   | 0.0     | 0.203 |
|                                                  | 51-60                     | 15  | 25.9                   | 6   | 40.0    |       |
|                                                  | 61-70                     | 17  | 29.3                   | 3   | 20.0    |       |
|                                                  | 71-80                     | 10  | 17.2                   | 5   | 33.3    |       |
|                                                  | > 80                      | 5   | 8.6                    | 1   | 6.7     |       |
| Sex                                              | Female                    | 44  | 75.9                   | 10  | 66.7    | 0.516 |
|                                                  | Male                      | 14  | 24.1                   | 5   | 33.3    |       |
| Number of additional drugs (excluding PRN drugs) | ≤ 5                       | 45  | 77.6                   | 10  | 66.7    | 0.514 |
|                                                  | 6-10                      | 9   | 15.5                   | 3   | 20.0    |       |
|                                                  | > 10                      | 3   | 5.2                    | 2   | 13.3    |       |
|                                                  | No answer                 | 1   | 1.7                    | 0   | 0.0     |       |
| Tumour entity                                    | Breast cancer             | 21  | 36.2                   | 7   | 46.7    | 0.818 |
|                                                  | Colorectal cancer         | 25  | 43.1                   | 7   | 46.7    |       |
|                                                  | Gastric cancer            | 3   | 5.2                    | 0   | 0.0     |       |
|                                                  | Oesophageal cancer        | 1   | 1.7                    | 1   | 6.7     |       |
|                                                  | Ovarian cancer            | 3   | 5.2                    | 0   | 0.0     |       |
|                                                  | Cancer of unknown primary | 1   | 1.7                    | 0   | 0.0     |       |
|                                                  | Pancreatic cancer         | 3   | 5.2                    | 0   | 0.0     |       |
| Endometrial cancer                               | 1                         | 1.7 | 0                      | 0.0 |         |       |
| Therapy regimen at inclusion                     | Monotherapy               | 35  | 60.3                   | 7   | 46.7    | 0.339 |
|                                                  | Combination therapy       | 23  | 39.7                   | 8   | 53.3    |       |
| Treatment intention                              | curative                  | 8   | 13.8                   | 3   | 20.0    | 0.686 |
|                                                  | palliative                | 50  | 86.2                   | 12  | 80.0    |       |
| Classified time since diagnosis                  | < ½ year                  | 15  | 25.9                   | 4   | 26.7    | 0.712 |
|                                                  | ½ to 2 years              | 22  | 37.9                   | 4   | 26.7    |       |
|                                                  | > 2 years                 | 21  | 36.2                   | 7   | 46.7    |       |
| Therapy setting                                  | Oncology outpatient ward  | 51  | 87.9                   | 9   | 60.0    | 0.021 |
|                                                  | Oncology practice         | 7   | 12.1                   | 6   | 40.0    |       |

### Initially adherent patients

Initially adherent patients were observed for a median time of 119.0 days (range 21.0-152.0; IQR=69.8-126.0). During all observed cycles, a high percentage of these patients showed a daily adherence equal or greater 90% (Figure 2A). After the sixth cycle, 36 of 37 (97.3%, CI 88.8%-99.4%) initially adherent patients showed a daily adherence  $\geq 90\%$ . Since the CI does not include 75% it is shown with a type I error of 5% that more than 75% of the initially adherent patients remained adherent after the modular medication management (without specific adherence support).

Figure 2B shows the same kind of data analysis for the daily intake adherence (excluding therapy-free interval). The fraction of initially adherent patients with a daily intake adherence

1  
2  
3  $\geq 90\%$  was lower compared to daily adherence reflecting that adherence is lower during intake  
4 than rest periods.  
5

6  
7 Figure 3 demonstrates that variability with regard to daily adherence increased from cycle 1  
8 compared to further cycles. Median daily adherence was 100% in every cycle. Mean daily  
9 adherence decreased from 98.9% in cycle 1 to 97.3% in cycle 6. Online table A provides more  
10 detailed information. Although initially adherent patients did not receive specific adherence  
11 support, a consistently high median daily adherence in a majority of these patients was  
12 observed. Only in exceptional cases median daily adherence was observed to be lower than  
13 90%. Individual daily adherence profiles of each patient over the observation period are  
14 provided in online figure A.  
15  
16  
17  
18  
19  
20

### 21 **Initially non-adherent patients**

22  
23 Initially non-adherent patients were observed for a median time of 118.0 days (range 35.0-  
24 140.0; IQR=96.0-126.0). Figure 2A illustrates the percentage of patients who showed a daily  
25 adherence equal or greater than 90% during the different cycles. Adherence increased in  
26 association with the specific support provided. In cycle 2 the percentage of adherent patients  
27 was 80.0% (12/15) compared to 40.0% (6/15) in cycle 1 and it ranged between 75.0 % and  
28 84.6% in the following cycles 3 to 6. After completion of the sixth cycle, daily adherence of six  
29 out of eight (75.0%, CI 46.0%-91.3%) initially non-adherent patients accounted for  $\geq 90\%$ .  
30 Since the CI included 80% which was the cut-off value used for sample size determination of  
31 initially non-adherent patients, it could not be proven that  $>80\%$  of initially non-adherent  
32 patients were adherent after the intervention.  
33  
34  
35  
36  
37  
38

39 Figure 2B shows the percentage of initially non-adherent patients with a daily intake adherence  
40  $\geq 90\%$  over the cycles. In contrast to the initially adherent patients, the fractions of initially non-  
41 adherent patients exhibiting a daily adherence  $\geq 90\%$  and a daily intake adherence  $\geq 90\%$  did not  
42 exhibit major differences.  
43  
44

45 Median daily adherence increased from 85.7% in cycle 1 to 97.6% in cycle 6, see figure 4.  
46 Mean daily adherence accounted for 80.8% during the first cycle and was found to be greater  
47 than 90% during the application of the adherence support module (online table B). Adherence  
48 varied widely between patients but also from cycle to cycle in the same patients. Online  
49 figure B shows individual daily adherence profiles of initially non-adherent patients during the  
50 course of the study calculated for intake plus rest period.  
51  
52  
53  
54  
55  
56  
57  
58  
59  
60

### **Potential predictors of adherence**

1  
2  
3 There was no indication of an existing relationship between patients' daily adherence during the  
4 first cycle and their age (Spearman's  $r=0.009$ ,  $p=0.941$ ) or gender ( $p=0.891$ , Mann-Whitney-U  
5 test). In addition, there was not any significant association between daily adherence and any  
6 further socio-demographic and disease-related characteristics.  
7  
8  
9

### 10 11 **Persistence**

12 All study patients were persistent during the whole period they were prescribed capecitabine  
13 chemotherapy. No patient performed an unauthorised discontinuation of his capecitabine  
14 treatment.  
15  
16  
17

18 However, in 17 of the 58 (29.3%) initially adherent patients capecitabine therapy was  
19 discontinued prematurely by the physicians. In 12 patients this decision was taken due to  
20 tumour progression. Further reasons for therapy discontinuation were adverse drug reactions  
21 (hand-foot syndrome and haemolytic anemia), hospital admission, the toxicity of a co-  
22 administered drug, and the patient's wish to stop treatment. 36 (62.1%) patients completed six  
23 cycles as planned, two patients (3.4%) completed less than six capecitabine cycles as planned,  
24 one patient (1.7%) died after the completion of the third cycle and two patients quit their study  
25 participation during the second cycle.  
26  
27  
28  
29  
30

31 In five of 15 (33.3%) initially non-adherent patients capecitabine therapy was discontinued  
32 prematurely due to tumour progression. Eight patients (53.3%) completed six capecitabine  
33 cycles as planned, one patient (6.7%) completed five cycles as planned, and one patient died  
34 during the second cycle.  
35  
36  
37  
38  
39  
40  
41  
42  
43  
44  
45  
46  
47  
48  
49  
50  
51  
52  
53  
54  
55  
56  
57  
58  
59  
60

## DISCUSSION

In this study, we applied a systematic screening for non-adherent patients at an early stage of their capecitabine chemotherapy to provide a patient-tailored modular medication management. The results indicate that specific adherence support might improve adherence of initially non-adherent patients to capecitabine and that initially adherent patients' medication taking behaviour persists over time under basic pharmaceutical care and adverse event management.

### Sample size of initially non-adherent patients

A major limitation of our study is the relatively small number of initially non-adherent patients. Instead of the required sample size of 30 initially non-adherent patients, only 15 patients could be enrolled during the study period. Previous data suggested a distribution of 60% initially adherent and 40% initially non-adherent patients.<sup>25</sup> The actual distribution within our patient population was 80% to 20%. This has to be considered before interpreting data of the initially non-adherent patients. However, a clear trend towards an improved adherence over time was observed. Further multicenter studies are needed to provide better generalisable findings.

### Adherence screening

For the classification of patients as initially non-adherent or adherent, we used daily adherence of the first drug intake period plus the first day of the therapy-free interval assessed by MEMS<sup>®</sup>. Consideration of the whole capecitabine cycle would have provided a more complete picture of the participant's adherence during the first cycle. However, this was not feasible. To initiate adherence support before the start of cycle 2, an exact appointment on day 21 of the first cycle for group allocation would have been necessary. A belated start of the adherence supporting module would have biased the results of initially non-adherent patients.

Our approach using the gold standard of adherence assessment was suitable to discriminate between adhering and non-adhering patients. In theory it would be less costly and labour intensive to identify non-adhering patients alternatively by means of possible predictors, eg by a specific questionnaire. In general, numerous factors associated with non-adherence to oral anti-cancer drugs have been identified like eg side effects, forgetfulness, or disliking aspects of treatment.<sup>20 30</sup> On the basis of our data, it was, however, not possible to derive significant information on adherence from socio-demographic or disease-related characteristics, eg age. Indeed, we observed that the three patients exhibiting the lowest baseline adherence during cycle 1 (28.6%, 57.1%, and 64.3%) were of a relatively old age (90, 75, and 79 years). However, from this result it cannot be concluded that adherence decreases with increasing age

1  
2  
3 as there were also elderly patients exhibiting high adherence. Our findings are in line with the  
4 findings of Partridge et al who did not find an association of adherence and age.<sup>21</sup> Furthermore,  
5 Bhattacharya et al did not identify significant associations between self-reported adherence to  
6 capecitabine and experience of side effects, beliefs about capecitabine, or satisfaction with  
7 information. However, the generalisability of that study was also limited by a relatively small  
8 sample size.<sup>24</sup> Therefore, larger multi-centre studies are necessary to identify precise predictors  
9 of non-adherence to capecitabine.  
10  
11  
12  
13

### 14 15 16 **Effect of modular medication management**

17  
18 Adherence rates in our study were higher than those reported by Partridge et al who found an  
19 average overall adherence measured by MEMS<sup>®</sup> (defined as the number of doses taken divided  
20 by the number of doses prescribed) between 70% to 80%.<sup>21</sup> Analysing our data the same way,  
21 overall adherence values ranged between 98.2% and 100.5% in initially adherent patients and  
22 between 93.8% and 102.7% in initially non-adherent patients. High adherence results in this  
23 study might be explained by the fact that every participant of the present study received two  
24 pharmaceutical care modules during all six cycles. Regardless the specific adherence support,  
25 elements of module 1 and 2, such as an individual medication plan and patient counselling  
26 regarding prophylaxis, detection and treatment of adverse effects, might have had a beneficial  
27 effect on adherence of both initially adherent and initially non-adherent patients as shown  
28 previously.<sup>25</sup>  
29  
30  
31  
32  
33  
34

35  
36 However, in case of initially non-adherent patients, the provided adherence support might have  
37 increased adherence additionally. This finding is consistent with previous results from our  
38 working group. Under the provision of intensified pharmaceutical care to 48 breast and  
39 colorectal cancer patients, the intervention group showed an increased mean overall adherence  
40 in comparison to the control group.<sup>25</sup> In line with previous results<sup>21 25 25</sup>, non-persistence did not  
41 present a problem in our group of patients.  
42  
43  
44  
45  
46

### 47 **Daily adherence versus daily intake adherence**

48  
49 Daily adherence during the intake periods of each cycle was generally lower compared to daily  
50 adherence calculated on the basis of drug intake plus rest period. This implies that adherence to  
51 the regimen was better in the rest period when the drug should not be taken, i.e. not many  
52 patients took the drug by mistake. However, eight of 15 (53.3%) patients took capecitabine one  
53 day too long, too short or completely ignored the break. From this finding we conclude that  
54 special attention has to be paid to the change of drug intake to drug-free days in the first  
55 capecitabine cycle. Patients have to be educated in detail regarding this particularity of the  
56  
57  
58  
59  
60



1  
2  
3 capecitabine treatment regimen. The attending health care provider should inform the patient  
4 exactly on the dates of the intake-free period. Written notes can serve as mnemonic devices.  
5  
6 Future studies should further facilitate the development of appropriate adherence parameters in  
7  
8 order to improve the reflection of the longitudinal aspect of adherence data.  
9

### 11 **Adherence management**

12  
13 Even though daily adherence could be improved in initially non-adherent patients, it has to be  
14 pointed out that this patient population did not reach the same adherence level as initially  
15 adherent patients. Moreover, inter-individual variability of adherence was higher. This finding  
16 suggests that a subgroup of patients with low adherence benefits from the adherence-enhancing  
17 intervention as suggested by Simons et al.<sup>25</sup> However, a certain number of patients cannot be  
18 reached and reveals a resistant medication taking behaviour. Reasons for intentional non-  
19 adherence in those patients were difficulties in swallowing tablets due to nausea and emesis  
20 caused by capecitabine (despite the provision of antiemetic prophylaxis and treatment),  
21 averseness to medication, or “compensating“ intake for previous non-adherence during  
22 treatment break. Unintentional non-adherence was mainly based on forgetfulness. Further  
23 research should include a systematic approach to develop strategies for adherence management  
24 in those ‘resistant’ patients. The adherence of intentionally non-adherent patients could be  
25 enhanced by means of advanced educational interventions. Behavioural interventions such as  
26 medication dosette boxes or alarm clocks could be used more extensively in the adherence  
27 enhancement of unintentionally non-adherent patients.  
28  
29  
30  
31  
32  
33  
34  
35  
36  
37  
38  
39

### 40 **Conclusions**

41 In summary, the results of this study demonstrate the potential of an early adherence screening  
42 for non-adherence and an individually applied modular medication management to use limited  
43 resources most efficiently. The provided adherence support is associated with enhanced  
44 adherence of initially non-adherent patients to oral chemotherapy. Moreover, the provision of  
45 basic pharmaceutical care and adverse event management was sufficient to maintain adherence  
46 in initially adherent patients for at least six cycles. The identification of potential predictors of  
47 adherence would facilitate the utilisation and broad application of the proposed adherence  
48 screening and modular medication management.  
49  
50  
51  
52  
53  
54  
55  
56  
57  
58  
59  
60

## Acknowledgements, Competing interests, Funding

**Acknowledgements:** We thank all patients who were willing to participate in our study. Furthermore, we thank Regina Moka as well as all oncologists and nurses who supported the conduction of our study.

**Funding:** A supplementary grant was provided by Roche, Basel. However, the researchers were entirely independent during all phases of this work.

**Competing interests:** All authors have completed the ICMJE uniform disclosure at [www.icmje.org/coi\\_disclosure.pdf](http://www.icmje.org/coi_disclosure.pdf) (available on request from the corresponding author) and declare that there have been no competing interests.

**Patient consent:** Obtained.

**Ethics approval:** This study was conducted with the approval of the ethics committee of the University of Bonn, Germany (consecutive number 042/09).

**Contributorship statement:** LK and UJ conceived the study design, substantially contributed to data analysis and interpretation, and drafted the manuscript. LK, YDK, PFS and CS were involved in the data collection and provision of multidisciplinary patient care. RF contributed substantially to statistical data analysis and interpretation. UJ is the guarantor. All authors critically reviewed the manuscript and gave their final approval for the version to be published.

**Provenance and peer review:** Not commissioned; externally peer reviewed.

**Data sharing statement:** Extra data is available by e-mailing Ulrich Jaehde ([u.jaehde@uni-bonn.de](mailto:u.jaehde@uni-bonn.de)).

All authors, external and internal, had full access to all of the data (including statistical reports and tables) in the study and can take responsibility for the integrity of the data and the accuracy of the data analysis.

**REFERENCES**

1. Findlay M, Minckwitz G von, Wardley A. Effective oral chemotherapy for breast cancer: pillars of strength. *Ann Oncol* 2008;**19**:212–22.
2. Weingart SN, Brown E, Bach PB, *et al*. NCCN Task Force Report: Oral chemotherapy. *J Natl Compr Canc Netw* 2008;**6**(Suppl 3):S1-14.
3. Halfdanarson TR, Jatoi A. Oral cancer chemotherapy: the critical interplay between patient education and patient safety. *Curr Oncol Rep* 2010;**12**:247–52.
4. Schott S, Schneeweiss A, Reinhardt J, *et al*. Acceptance of oral chemotherapy in breast cancer patients - a survey study. *BMC Cancer* 2011;**11**:129.
5. Górnaś M, Szczylik C. Oral treatment of metastatic breast cancer with capecitabine: what influences the decision-making process? *Eur J Cancer Care (Engl)* 2010;**19**:131–6.
6. Weingart SN, Flug J, Brouillard D, *et al*. Oral chemotherapy safety practices at US cancer centres: questionnaire survey. *BMJ* 2007;**334**:407.
7. Wood L. A review on adherence management in patients on oral cancer therapies. *Eur J Oncol Nurs* 2012;**16**:432–8.
8. Parsad SD, Ratain MJ. Prescribing oral chemotherapy. *BMJ* 2007;**334**:376.
9. Schneider SM, Hess K, Gosselin T. Interventions to promote adherence with oral agents. *Semin Oncol Nurs* 2011;**27**:133–41.
10. Cassidy J. First-line oral capecitabine therapy in metastatic colorectal cancer: a favorable safety profile compared with intravenous 5-fluorouracil/leucovorin. *Ann Oncol* 2002;**13**:566–75.
11. Walko CM, Lindley C. Capecitabine: a review. *Clin Ther* 2005;**27**:23–44.
12. Sabaté E. Adherence to long-term therapies: evidence for action. Geneva: WHO; 2003.
13. Cutler DM, Everett W. Thinking outside the pillbox-medication adherence as a priority for health care reform. *N Engl J Med* 2010;**362**:1553–5.
14. Winterhalder R, Hoesli P, Delmore G, *et al*. Self-reported compliance with capecitabine: findings from a prospective cohort analysis. *Oncology* 2011;**80**:29–33.
15. Ruddy K, Mayer E, Partridge A. Patient adherence and persistence with oral anticancer treatment. *CA Cancer J Clin* 2009;**59**:56–66.
16. Osterberg L, Blaschke T. Adherence to medication. *N Engl J Med* 2005;**353**:487–97.
17. Waterhouse DM, Calzone KA, Mele C, *et al*. Adherence to oral tamoxifen: a comparison of patient self-report, pill counts, and microelectronic monitoring. *J Clin Oncol* 1993;**11**:1189–97.

18. Haynes RB, McDonald HP, Garg AX. Helping patients follow prescribed treatment: clinical applications. *JAMA* 2002;**288**:2880–3.
19. Spoelstra SL, Given CW. Assessment and measurement of adherence to oral antineoplastic agents. *Semin Oncol Nurs* 2011;**27**:116–32.
20. Foulon V, Schöffski P, Wolter P. Patient adherence to oral anticancer drugs: an emerging issue in modern oncology. *Acta Clin Belg* 2011;**66**:85–96.
21. Partridge AH, Archer L, Kornblith AB, *et al.* Adherence and persistence with oral adjuvant chemotherapy in older women with early-stage breast cancer in CALGB 49907: adherence companion study 60104. *J Clin Oncol* 2010;**28**:2418–22.
22. Muss HB, Berry DA, Cirrincione CT, *et al.* Adjuvant chemotherapy in older women with early-stage breast cancer. *N Engl J Med* 2009;**360**:2055–65.
23. Mayer EL, Partridge AH, Harris LN, *et al.* Tolerability of and adherence to combination oral therapy with gefitinib and capecitabine in metastatic breast cancer. *Breast Cancer Res Treat* 2009;**117**:615–23.
24. Bhattacharya D, Easthall C, Willoughby KA, *et al.* Capecitabine non-adherence: exploration of magnitude, nature and contributing factors. *J Oncol Pharm Pract* 2012;**18**:333–42.
25. Simons S, Ringsdorf S, Braun M, *et al.* Enhancing adherence to capecitabine chemotherapy by means of multidisciplinary pharmaceutical care. *Support Care Cancer* 2011;**19**:1009–18.
26. Vrijens B, Geest S de, Hughes DA, *et al.* A new taxonomy for describing and defining adherence to medications. *Br J Clin Pharmacol* 2012;**73**:691–705.
27. Cramer JA. Microelectronic systems for monitoring and enhancing patient compliance with medication regimens. *Drugs* 1995;**49**:321–7.
28. Denhaerynck K, Schäfer-Keller P, Young J, *et al.* Examining assumptions regarding valid electronic monitoring of medication therapy: development of a validation framework and its application on a European sample of kidney transplant patients. *BMC Med Res Methodol* 2008;**8**:5.
29. Demonceau J, Ruppert T, Kristanto P, *et al.* Identification and assessment of adherence-enhancing interventions in studies assessing medication adherence through electronically compiled drug dosing histories: a systematic literature review and meta-analysis. *Drugs* 2013;**73**:545–62.
30. Noens L, van Lierde M, Bock R de, *et al.* Prevalence, determinants, and outcomes of nonadherence to imatinib therapy in patients with chronic myeloid leukemia: the ADAGIO study. *Blood* 2009;**113**:5401–11.

## FIGURE AND TABLE LEGENDS

Figure 1: Patient recruitment flow diagram

Figure 2: Percentage of patients exhibiting a **A** daily adherence  $\geq 90\%$  (during intake and rest periods) and a **B** daily intake adherence  $\geq 90\%$  (during the intake periods only)

Figure 3: Daily adherence of initially adherent patients during cycle 1 to 6 (the median is represented by the black band in every box; bottom and top of each box are the first and third quartiles; circles are 1.5-3 times the box height away from the box; stars are  $>3$  times the box height away from the box)

Figure 4: Daily adherence of initially non-adherent patients during cycle 1 to 6 (the median is represented by the black band in every box; bottom and top of each box are the first and third quartiles; circles are 1.5-3 times the box height away from the box; stars are  $>3$  times the box height away from the box)

Table 1: Socio-demographic and disease-related patient characteristics

Online figure A: Individual daily adherence of initially adherent patients during the course of the study, each different coloured line represents one patient, the black line represents median daily adherence; cycle 1: n=58, cycle 2: n=56, cycle 3: n=48, cycle 4: n=45, cycle 5: n=40, cycle 6: n=37

Online figure B: Individual daily adherence of initially non-adherent patients during the course of the study, each different coloured line represents one patient, the black line represents median daily adherence; cycle 1: n=15, cycle 2: n=15, cycle 3: n=13, cycle 4: n=12, cycle 5: n=12, cycle 6: n=8

Online table A: Daily adherence of initially adherent patients (calculation based on intake and rest period)

Online table B: Daily adherence of initially non-adherent patients (calculation based on intake and rest period)

First patient in 07/2009, last patient in 11/2011, last patient out 03/2012

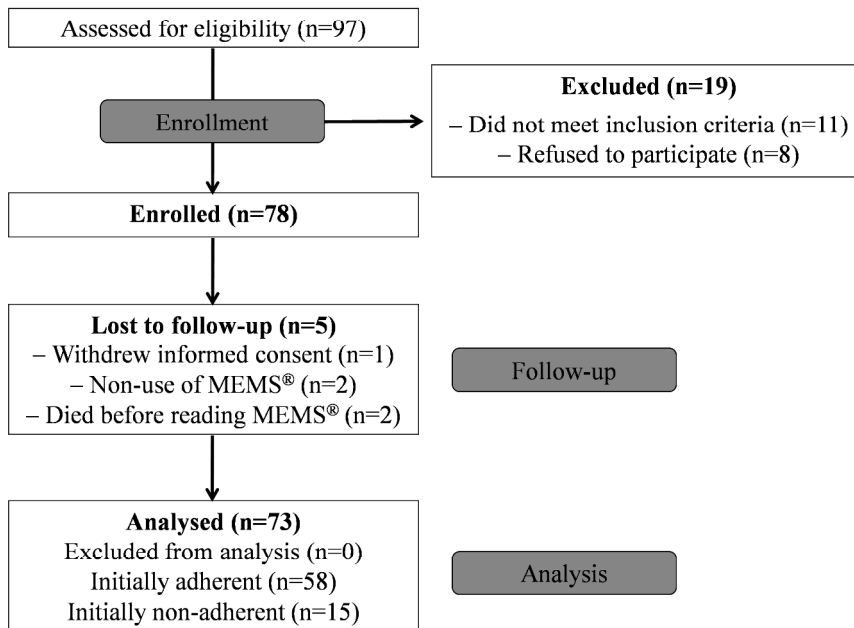

Fig. 1: Patient recruitment flow diagram  
254x190mm (300 x 300 DPI)

1  
2  
3  
4  
5  
6  
7  
8  
9  
10  
11  
12  
13  
14  
15  
16  
17  
18  
19  
20  
21  
22  
23  
24  
25  
26  
27  
28  
29  
30  
31  
32  
33  
34  
35  
36  
37  
38  
39  
40  
41  
42  
43  
44  
45  
46  
47  
48  
49  
50  
51  
52  
53  
54  
55  
56  
57  
58  
59  
60

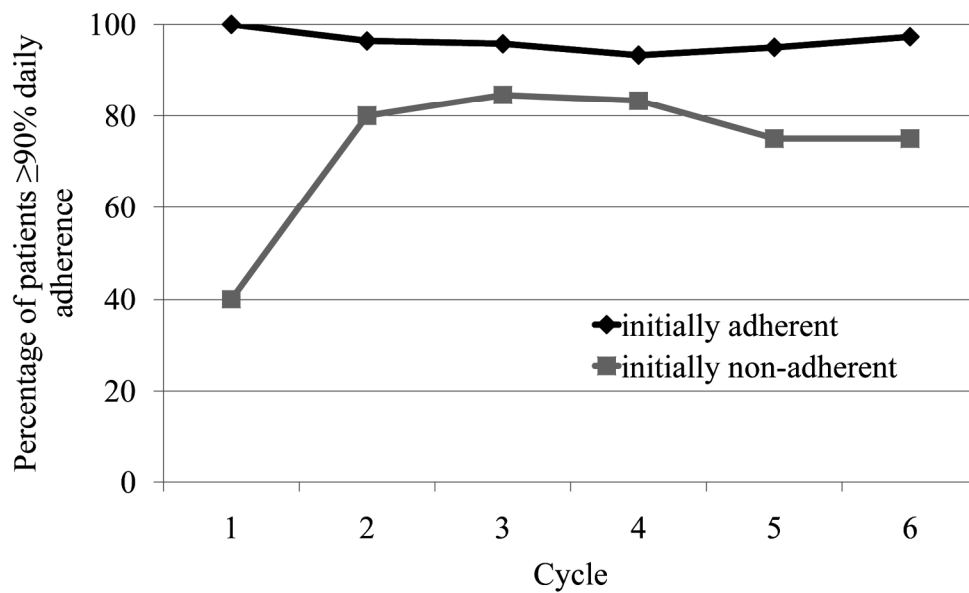

Fig. 2A: Percentage of patients exhibiting a daily adherence  $\geq 90\%$  (during intake and rest periods)  
180x109mm (300 x 300 DPI)

Review only

1  
2  
3  
4  
5  
6  
7  
8  
9  
10  
11  
12  
13  
14  
15  
16  
17  
18  
19  
20  
21  
22  
23  
24  
25  
26  
27  
28  
29  
30  
31  
32  
33  
34  
35  
36  
37  
38  
39  
40  
41  
42  
43  
44  
45  
46  
47  
48  
49  
50  
51  
52  
53  
54  
55  
56  
57  
58  
59  
60

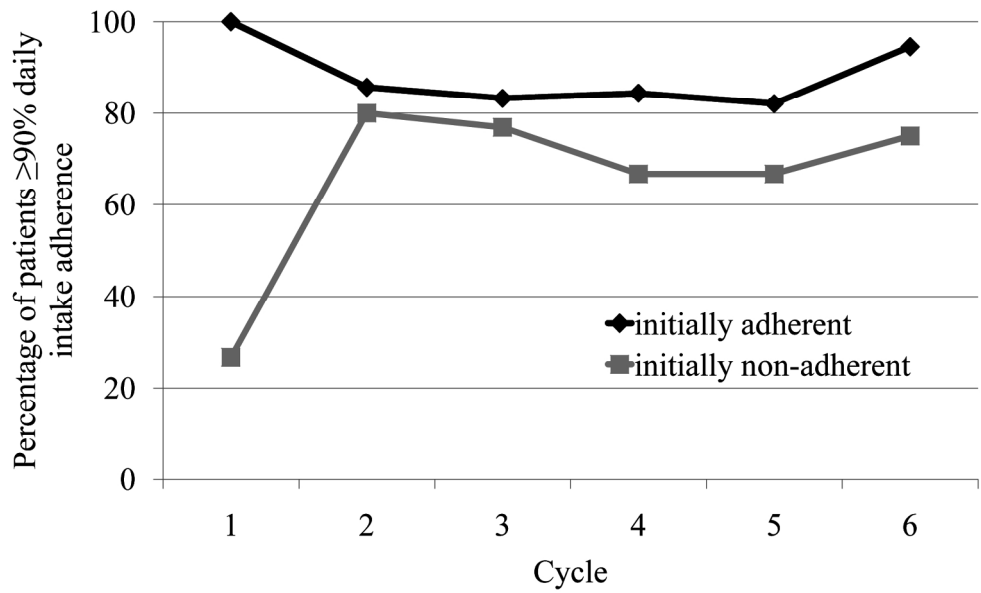

Fig. 2B: Percentage of patients exhibiting a daily intake adherence  $\geq 90\%$  (during the intake periods only)  
180x109mm (300 x 300 DPI)

Review only





Fig. 3: Daily adherence of initially adherent patients during cycle 1 to 6  
158x127mm (300 x 300 DPI)

1  
2  
3  
4  
5  
6  
7  
8  
9  
10  
11  
12  
13  
14  
15  
16  
17  
18  
19  
20  
21  
22  
23  
24  
25  
26  
27  
28  
29  
30  
31  
32  
33  
34  
35  
36  
37  
38  
39  
40  
41  
42  
43  
44  
45  
46  
47  
48  
49  
50  
51  
52  
53  
54  
55  
56  
57  
58  
59  
60

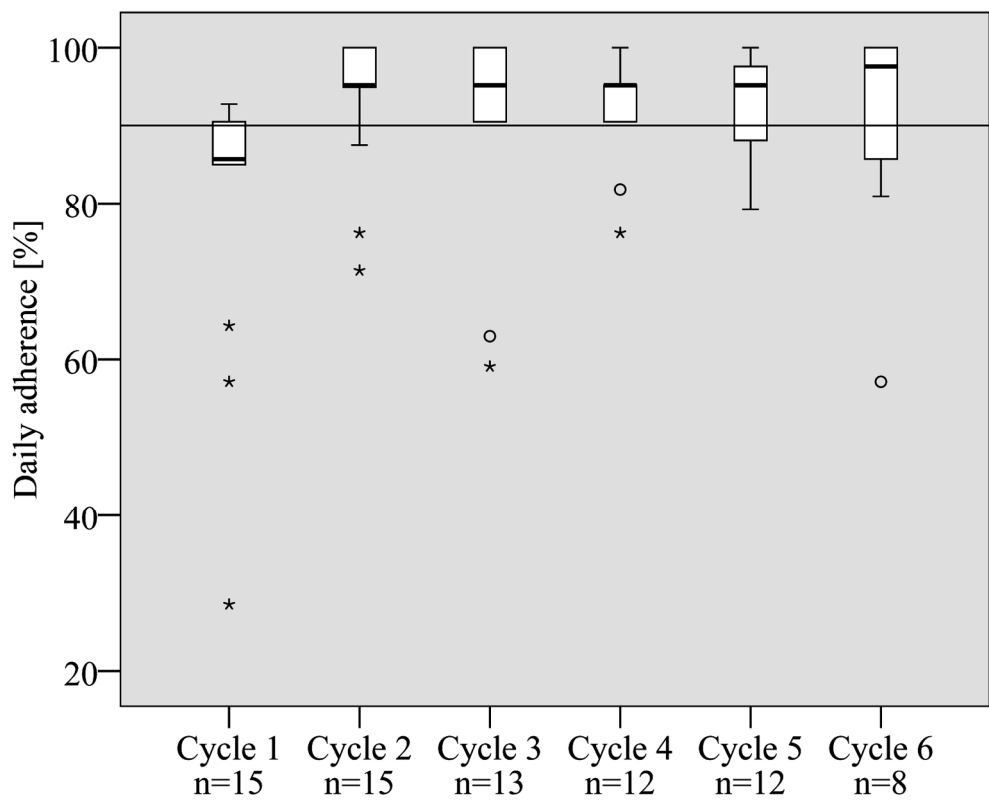

Fig. 4: Daily adherence of initially non-adherent patients during cycle 1 to 6  
158x127mm (300 x 300 DPI)



Online Fig. A: Individual daily adherence of initially adherent patients during the course of the study; cycle 1: n=58, cycle 2: n=56, cycle 3: n=48, cycle 4: n=45, cycle 5: n=40, cycle 6: n=37, the black line represents median daily adherence  
180x94mm (300 x 300 DPI)

review only

1  
2  
3  
4  
5  
6  
7  
8  
9  
10  
11  
12  
13  
14  
15  
16  
17  
18  
19  
20  
21  
22  
23  
24  
25  
26  
27  
28  
29  
30  
31  
32  
33  
34  
35  
36  
37  
38  
39  
40  
41  
42  
43  
44  
45  
46  
47  
48  
49  
50  
51  
52  
53  
54  
55  
56  
57  
58  
59  
60

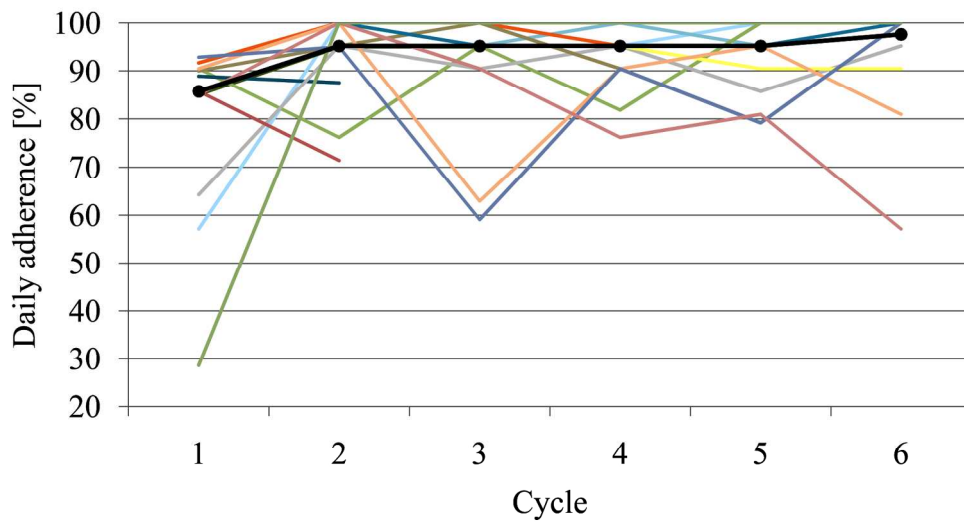

Online Fig. B: Individual daily adherence of initially non-adherent patients during the course of the study; cycle 1: n=15, cycle 2: n=15, cycle 3: n=13, cycle 4: n=12, cycle :5 n=12, cycle 6: n=8; the black line represents the median daily adherence  
180x97mm (300 x 300 DPI)

review only

1  
2  
3  
4  
5  
6 **Adherence management for cancer patients on capecitabine: a**  
7 **prospective two-arm cohort study**  
8  
9

Formatted

10 Linda Krolop, Yon-Dschun Ko, Peter Florian Schwindt, Claudia Schumacher, Rolf Fimmers,  
11 Ulrich Jaehde  
12

13  
14 Institute of Pharmacy, Clinical Pharmacy, University of Bonn, An der Immenburg 4, 53121  
15 Bonn, Germany Linda Krolop pharmacist; Internal Medicine, Johanniter Hospital,  
16 Johanniterstrasse 3-5, 53113 Bonn, Germany Yon-Dschun Ko professor of internal medicine;  
17 Oncology Practice, Straesschensweg 16, 53113 Bonn, Germany Peter Florian Schwindt  
18 oncologist; Specialist Breast Unit / Senology, St. Elisabeth Hospital Cologne-Hohenlind,  
19 Werthmannstraße 1, 50935 Cologne, Germany Claudia Schumacher senior physician; Institute  
20 for Medical Biometry, Informatics and Epidemiology, University of Bonn, Sigmund-Freud-Str.  
21 25, 53127 Bonn, Germany Rolf Fimmers statistician; Institute of Pharmacy, Clinical Pharmacy,  
22 University of Bonn, An der Immenburg 4, 53121 Bonn, Germany Ulrich Jaehde professor of  
23 clinical pharmacy  
24  
25  
26  
27  
28  
29

30 Correspondence to: Prof. Dr. Ulrich Jaehde, u.jaehde@uni-bonn.de, Tel: +49-228-73-5252, Fax:  
31 +49-228-73-9757  
32  
33

34  
35 Key words: adherence, compliance, capecitabine, pharmaceutical care, oral chemotherapy  
36

37 Word count: ~~4,308~~4,021  
38  
39  
40  
41  
42  
43  
44  
45  
46  
47  
48  
49  
50  
51  
52  
53  
54  
55  
56  
57  
58  
59  
60

## ARTICLE SUMMARY

### Article Focus

- Adequate patient adherence to capecitabine, an orally administered prodrug of fluorouracil, is essential for treatment success. The early identification of potential non-adherers followed by adherence-enhancing measures may contribute to the effectiveness of oral anticancer drug therapy.
- This prospective, multi-centred observational cohort study aimed ~~at the~~ development and ~~evaluation-evaluate of~~ a multiprofessional ~~approach-medication management~~ to assure adherence to capecitabine.
- It was hypothesized that adherence of initially adherent patients ( $\geq 90\%$  adherence during the first cycle) would remain high over time without specific support and that initially non-adherent patients ( $< 90\%$  adherence during the first cycle) would benefit from specific adherence support.

### Key Messages

- An early adherence screening effectively distinguishes between patients adhering and non-adhering to capecitabine.
- The provision of specific adherence support ~~can enhance~~ is associated with enhanced adherence of initially non-adherent patients.
- Initially adherent patients remain adherent for at least six cycles without specific support implying that targeted support to those patients who benefit from it is a reasonable approach.

### Strengths and Limitations

- Our approach is multiprofessional and needs-based utilising available resources for adherence management most efficiently.
- The relatively small sample size of initially non-adherent patients limits the validity of the observed results for this subgroup of patients.

## ABSTRACT

**Background:** Capecitabine, an orally administered prodrug of fluorouracil, is administered twice daily for ~~14 days~~ two weeks followed by ~~a seven day rest period~~ one week off. Adequate patient adherence is essential for treatment success. The early identification of potential non-adherers followed by adherence-enhancing measures may contribute to the effectiveness of oral anticancer drug therapy.

**Objective:** To develop and evaluate a multiprofessional ~~approach~~ modular medication management to assure adherence to capecitabine.

**Methods:** The study was conducted as a prospective, multi-centred observational cohort study. All participants received pharmaceutical care consisting of oral and written information. Daily adherence was defined as percentage of days with correctly administered capecitabine doses and assessed using electronic monitoring (MEMS<sup>®</sup>). According to their daily adherence during the first cycle, patients were identified as initially non-adherent (<90% adherence) or adherent (≥90% adherence). Initially non-adherent patients received additional adherence support.

**Results:** Seventy-three patients with various tumour entities were enrolled, 58 were initially adherent and 15 non-adherent. Median daily adherence of initially non-adherent patients increased from 85.7% to 97.6% during the observation period of six cycles. Throughout all cycles, median daily adherence of initially adherent patients was 100.0%. Daily adherence was not associated with socio-demographic and disease-related factors. No patient was non-persistent.

**Conclusions:** An early adherence screening effectively distinguishes between patients adhering and non-adhering to capecitabine. The provision of specific adherence support ~~can~~ is associated with enhanced adherence of initially non-adherent patients, whereas initially adherent patients remain adherent for at least six cycles without specific support. Our needs-based approach helps to use available resources for adherence management efficiently.

## INTRODUCTION

Cancer therapy has traditionally been dominated by intravenously administered agents.<sup>1</sup> However, oral anti-cancer drugs are increasingly used and more than one-quarter of all anti-cancer drugs currently under development are orally administered.<sup>2,3</sup> Oral anti-cancer therapies are highly accepted by patients based on obvious advantages, e.g. higher convenience, avoidance of venipuncture and paravasates, and greater patient autonomy.<sup>2,4,5</sup> However, these treatments are also associated with many challenges. Due to less intense contact between patient and health care providers, responsibilities in terms of managing the course of treatment are transferred to the patient such as monitoring of doses and toxicity.<sup>2,6</sup> In contrast to intravenously administered anti-cancer treatments, health care providers cannot always assume that patients are adherent which is, however, the key prerequisite for treatment success. Multidisciplinary patient care and specific patient education regarding all aspects of the treatment regimen are crucial to maintain adherence.<sup>6-9</sup>

Patients of the present study were treated with the chemotherapeutic agent capecitabine, an orally administered prodrug of cytotoxic fluorouracil (5 FU). Capecitabine has an improved tolerability and comparable efficacy compared with infusional or bolus 5 FU<sup>10</sup> and is frequently used in the treatment of breast, colorectal, and gastric cancer. Moreover, ovarian, pancreatic, or oesophageal tumours may be treated with capecitabine. One capecitabine cycle consists of three weeks, two weeks of twice daily drug intake followed by seven days of break. Usually it is given in three week cycles, twice per day for two weeks separated by 12 hours, followed by a one week medication free interval.<sup>11</sup>

Patient adherence to prescribed treatment regimens for chronic non-oncologic diseases accounts for 50% on average only.<sup>12,13</sup> Cancer patients' medication taking behaviour is presumed to be particularly adherent, since cancer is a life-threatening disease.<sup>14-18</sup> However, adherence rates of oral anti-cancer agents were reported to range from 16% to 100% depending on the drug and method of measurement.<sup>15</sup> Exact measurement of adherence is a challenge and existing methods are limited for various reasons.<sup>19</sup> Best estimation of adherence may be provided by electronic monitoring such as the medication event monitoring system (MEMS<sup>®</sup>).<sup>20</sup>

Several studies have been published investigating patient adherence to capecitabine. Partridge et al used MEMS<sup>®</sup> for adherence assessment in older women with early-stage breast cancer, and defined adherence. Adherence was defined as the number of doses taken divided by the doses expected. 75% of the included patients were regarded as adherent, i.e. they performed more than 80% of the expected openings and were regarded as adherent. Average-Mean adherence was accounted for 78% across all cycles.<sup>21,22</sup> Winterhalder et al used participant self-reports to explore adherence in gastrointestinal and breast cancer patients. Any violation of the recommended treatment regimen, according to their diary entries, during the duration of the



1  
2  
3  
4  
5  
6 [capecitabine treatment was considered as non-adherence.](#) 91% (161/177) patients were found to  
7 be fully adherent, whereas only 9% (16/177) reported some kind of adherence error, ~~i.e. any~~  
8 ~~violation of the recommended regimen.~~<sup>14</sup> ~~In 13 younger metastatic breast cancer patients,~~  
9 ~~median~~ [The adherence of 13 younger metastatic breast cancer patients was](#) assessed using  
10 MEMS<sup>®</sup> ~~was and the median accounted for~~ 96%. Adherence was defined as observed [doses](#)  
11 divided by expected doses. Self-reported ~~median~~ [adherence was assessed additionally and the](#)  
12 [median of 12 patients](#) was 97% (n=12).<sup>23</sup> ~~In 43 breast and colorectal cancer patients,~~ ~~Self-~~  
13 reported non-adherence [of 43 breast and colorectal cancer patients](#) was 23.3%.<sup>24</sup> Furthermore,  
14 the effect of an intensified multidisciplinary pharmaceutical care programme [consisting of a](#)  
15 [combination of written and spoken information](#) on the adherence of cancer patients treated with  
16 capecitabine was investigated. Adherence was measured using MEMS<sup>®</sup> and defined as the  
17 percentage of days with correct medication taking behaviour. Patients who received  
18 pharmaceutical care showed a significantly higher mean daily adherence compared to the  
19 control group who received standard care (96.8% vs 87.2%, p=0.029).<sup>25</sup>

Formatted: Font color: Text 1, English (U.S.)

20 Thus, adherence rates of patients treated with capecitabine are relatively high compared to non-  
21 oncologic oral drugs but can still be increased by specific measures.<sup>25</sup> Conversely, this implies  
22 that only some patients treated with capecitabine are in need of an adherence-enhancing  
23 intervention and the limited resources could be used more efficiently. Certain patients manage  
24 their oral treatment regimen independently and do not benefit from ~~a~~ specialized patient care.  
25 [Therefore, we chose a modular medication management approach in this study.](#) ~~In this study, we~~  
26 ~~screened~~ ~~C~~ancer patients [were screened](#) for their adherence during their first capecitabine cycle  
27 to detect potential non-adherers. Initially adherent as well as non-adherent patients received  
28 basic pharmaceutical care and adverse event management. Specific adherence support was only  
29 applied to initially non-adherent patients.

30 [According to the recently published taxonomy for describing and defining adherence to](#)  
31 [medications](#)<sup>26</sup>, this study primarily addressed [the implementation element of adherence.](#) The aim  
32 ~~of the present study~~ was to identify initially non-adherent patients and to investigate initially  
33 non-adherent and initially adherent patients' adherence over time. It was hypothesized that  
34 adherence of initially adherent patients would remain high over time without specific support  
35 and that initially non-adherent patients would benefit from specific adherence support.

Formatted: English (U.K.)

## METHODS

### Study design

The study was conducted as a prospective, multi-centred, two-arm observational cohort study. One study arm consisted of patients classified as initially adherent (baseline daily adherence  $\geq 90\%$ ), the other arm of initially non-adherent patients (baseline daily adherence  $< 90\%$ ).

### Study setting and sample

The study was conducted in two oncology outpatient wards and one oncology practice. Data were collected between July 2009 and March 2012. After the identification of eligibility by the collaborating oncologists, [the study pharmacist asked the patients ~~were asked if they were willing~~ to participate in the study.](#) In case of acceptance, each participant signed a written informed consent. The study protocol considered a maximum observation period of six capecitabine cycles for every participant. The main inclusion criterion was the initiation of chemotherapy with capecitabine as single agent or combination therapy for treatment of cancer. Patients had to be capecitabine-naïve, at least 18 years old and able to speak, read and write German. Inclusion had to take place within two weeks after initiation of capecitabine treatment. Exclusion criteria implied any diagnosis of a disease or mental state compromising full understanding of purpose and course of the study. The ethics committee of the University of Bonn, Germany voted positively for this study.

### Adherence measurement

Adherence to capecitabine treatment was assessed using the Medication Event Monitoring System (MEMS<sup>®</sup>, Aardex Group Ltd., Zug, Switzerland).<sup>27</sup> Every participant was provided with a MEMS<sup>®</sup> container and asked to use it for storage of capecitabine medication during study participation. [For ethical reasons patients were informed about the fact that their adherence was being monitored.](#) The caps of the MEMS<sup>®</sup> containers recorded date and time of every opening. Patients were instructed to open the containers only when taking their capecitabine dose. In case of required refills, patients were requested to schedule refill and regular capecitabine intake at the same time in order to avoid additional openings. If this was not possible or in case of further extraordinary openings, patients were asked to note the respective information on a special documentation sheet. Since uncensored MEMS<sup>®</sup> data might overestimate non-adherence<sup>28</sup>, adherence data were censored according to information derived from notes and interviews (e.g. exclusion of self-reported non-monitoring intervals or extra openings, and intake of doses taken

from another source than MEMS<sup>®</sup>). Measurement ended after six completed capecitabine cycles or in case of premature treatment discontinuation.

### Adherence analysis

Adherence was studied using medication taking profiles uploaded from the MEMS<sup>®</sup> monitors and patients' information concerning extraordinary incidents. 'Daily adherence' was selected as primary endpoint. It was defined as percentage of days with correctly administered capecitabine doses (number of days with correct drug intake divided by number of observed days). In the case of missing MEMS<sup>®</sup> data the corresponding days were not included in the analysis, i.e. the number of observed days was reduced accordingly. Adherence was assessed on days with drug intake as well as days during the rest period. A day was considered as adherent only, if two openings of the MEMS<sup>®</sup> monitor were recorded on a day during the drug intake period (dosing interval  $\geq 6$  hours) or if no openings were recorded during the rest period.

~~Different measures of adherence were used. Basically, 'Daily adherence' was calculated for every individual cycle on the basis of (days with and without drug intake therapy-free interval). Furthermore, 'daily intake adherence' was calculated for every individual cycle on the basis of for the drug intake interval only and referred to as 'daily intake adherence'. This was done in order to exclude the influence of the rest-period intake-free interval on the adherence. Additionally, 'persistence' of drug intake was analysed. Duration of physician's capecitabine prescription was compared with the duration of the actual treatment by the participant.~~

For the classification of a participant as initially adherent or non-adherent, daily adherence was calculated for the intake period of the first cycle plus first day of the therapy-free interval. This parameter is referred to as 'baseline daily adherence'. A participant was classified as initially adherent (baseline daily adherence  $\geq 90\%$ ) or initially non-adherent (baseline daily adherence  $< 90\%$ ). Since no consensual standard for the definition of sufficient adherence exists<sup>16</sup>, the threshold of 90% was defined empirically based on the results of an earlier research project<sup>25</sup>. If assessment of baseline adherence resulted in a participant being initially non-adherent, adherence support was provided before the start of the second intake period.

### Modular medication management

In addition to standard care provided by physicians and nurses of the respective study centre, medication management consisted of three modules. ~~A detailed literature search was conducted to identify most valuable components of pharmaceutical care and adherence enhancement. On the basis of the reviewed literature the modules were developed, discussed and adapted. These modules were provided by a registered pharmacist of the Department of Clinical Pharmacy at~~

~~the University of Bonn, Germany.~~ Every study participant received module 1 (basic pharmaceutical care) as well as module 2 (adverse event management). These modules were provided by a registered pharmacist of the Department of Clinical Pharmacy at the University of Bonn, Germany, in collaboration with the attending physicians and nurses. If a participant was initially non-adherent, the pharmacist delivered module 3 (adherence support) ~~was applied to the patient~~ additionally.

Modules 1 and 2 were initiated after inclusion. Module 1 implied detailed medication history taking to perform drug-drug interaction checks and compile an individual medication plan. In case of identified drug-related problems, necessary changes of the medication were made in collaboration with the responsible physician. Patients were educated in detail about the cytotoxic agent capecitabine, its mechanism of action and the individual dosing regimen. Further anti-cancer agents, supportive therapy and other agents taken regularly were also addressed. Patient counselling was supported by the provision of written information material. Within module 2, patients were educated regarding common adverse effects (eg, hand-foot syndrome and diarrhea). Prophylaxis, detection and treatment of adverse effects were discussed in detail. If patients took other drugs or were prescribed a concomitant anti-cancer treatment, they were counselled regarding the adverse effects of these drugs as well. An information brochure regarding prevention and management of adverse effects caused by chemotherapy supported oral counselling.

Since feeding back to the patients electronically compiled adherence data has been demonstrated to be an effective approach to enhance adherence<sup>29</sup>, Module 3 contained a detailed discussion of the patient's individual adherence results on the basis of cycle 1 MEMS<sup>®</sup> data. Adherence support focussed on the identification of reasons for non-adherence to define a feasible adherence-enhancing strategy. Since various types of non-adherence exist, strategies to overcome individual barriers to adherence were designed individually. Strategies to improve unintentional non-adherence (eg due to forgetfulness) included treatment diaries or linking drug intake with a certain act of daily routine (cue dosing). In contrast, intentional non-adherence had to be approached in a completely different manner. If an adverse effect was the reason for not taking capecitabine, management and prevention of further adverse effects were addressed in accordance with module 2. Patients' expectations and experiences were included in all considerations. Moreover, an increase of the patient's awareness of the importance of adherence with capecitabine treatment was aimed. Routinely, beginning and end of the current and next capecitabine cycle were explicitly discussed. The content and course of the adherence-supporting session was adapted according to the patients' medication taking behaviour. If the participant showed a daily adherence <90%, the content of the first counselling session of module 3 was repeated and adherence-enhancing strategies were reassessed, discussed and adapted.

Formatted: English (U.S.)

Personal follow-up visits took place at least once every cycle. Between scheduled appointments every participant had the possibility to reach individual advice in person, by telephone or by email.

### Sample size calculation and statistical analysis

Sample size ~~determination calculations were based on one-sided exact binomial tests was and~~ conducted for the primary endpoint 'daily adherence'. Available adherence data<sup>25</sup> was analysed with regard to daily adherence of the participant's first capecitabine cycle. Regarding initially adherent patients a sample size of 45 was required to show with a power (1- $\beta$ ) of 80% that >75% of these patients remain being adherent (type I error of first kind ( $\alpha$ ) = 5%). The true population value of patients who persist being adherent was assumed to account for >90%. Regarding initially non-adherent patients, a sample size of 30 patients was required to show with a power (1- $\beta$ ) of 80% that >80% of these patients become adherent after the adherence support (type I error of first kind ( $\alpha$ ) = 5%). The true population value of patients who became adherent was assumed to account for >95%. Finally a dropout rate of 20% was estimated so that a total sample size of 90 patients resulted (54 initially adherent and 36 initially non-adherent patients).

Data entry and statistical data analysis were carried out using Excel<sup>®</sup> 2007 (Microsoft, Redmond, USA) and SPSS<sup>®</sup> Version 20 (SPSS<sup>®</sup> Inc., Chicago, USA, Statistical Package for the Social Sciences). Appropriate descriptive statistics was used to characterise the patient population and summarise the study results. Data were mostly binary, nominal, ordinal, or failed to follow a normal distribution, thus non-parametric testing was utilised consistently. Differences regarding socio-demographic and disease-related characteristics between initially adherent and non-adherent patients were tested using the Fisher's exact test for nominal data. To explore the relationship between adherence and potential predictors of adherence, Spearman's rank correlation coefficient was used for comparing two continuous data sets and Mann-Whitney-U analysis was used for comparing continuous (not normally distributed) data with binary data sets.

## RESULTS

During the data collection period participating oncologists assessed in total 97 patients for eligibility, 78 were enrolled in the study. Figure 1 provides a detailed overview of patient recruitment including reasons for exclusion and loss to follow-up. The main reason (seven out of eight refusals) for non-participation was perceived stress by the study in addition to their mentally and/or physically impaired condition. Since five patients were not capecitabine-naïve, two patients were not able to speak, read and write German and for four patients MEMS<sup>®</sup> use was not possible due to participation in another trial, they were not enrolled.

### Patient characteristics

Seventy-three patients were analysed for baseline daily adherence, 58 (79.5%) were initially adherent and 15 (20.5%) initially non-adherent. Table 1 shows that there was no statistically significant difference between initially adherent and non-adherent patients regarding socio-demographic and disease-related characteristics. However, there was a significant difference in the therapy setting ( $p=0.021$ , Fisher's exact test).

Table 1: Socio-demographic and disease-related patient characteristics

| Socio-demographic characteristics                | initially adherent        |          | initially non-adherent |      | P value        |      |
|--------------------------------------------------|---------------------------|----------|------------------------|------|----------------|------|
|                                                  | n                         | %        | n                      | %    |                |      |
| Classified age [years]                           | ≤ 50                      | 11       | 19.0                   | 0    | 0.203          |      |
|                                                  | 51-60                     | 15       | 25.9                   | 6    |                | 40.0 |
|                                                  | 61-70                     | 17       | 29.3                   | 3    |                | 20.0 |
|                                                  | 71-80                     | 10       | 17.2                   | 5    |                | 33.3 |
|                                                  | > 80                      | 5        | 8.6                    | 1    |                | 6.7  |
| Sex                                              | Female                    | 44       | 75.9                   | 10   | 0.516          |      |
|                                                  | Male                      | 14       | 24.1                   | 5    |                | 33.3 |
| Number of additional drugs (excluding PRN drugs) | ≤ 5                       | 45       | 77.6                   | 10   | 0.514          |      |
|                                                  | 6-10                      | 9        | 15.5                   | 3    |                | 20.0 |
|                                                  | > 10                      | 3        | 5.2                    | 2    |                | 13.3 |
|                                                  | No answer                 | 1        | 1.7                    | 0    |                | 0.0  |
| Tumour entity                                    | Breast cancer             | 21       | 36.2                   | 7    | 0.818          |      |
|                                                  | Colorectal cancer         | 25       | 43.1                   | 7    |                | 46.7 |
|                                                  | Gastric cancer            | 3        | 5.2                    | 0    |                | 0.0  |
|                                                  | Oesophageal cancer        | 1        | 1.7                    | 1    |                | 6.7  |
|                                                  | Ovarian cancer            | 3        | 5.2                    | 0    |                | 0.0  |
|                                                  | Cancer of unknown primary | 1        | 1.7                    | 0    |                | 0.0  |
|                                                  | Pancreatic cancer         | 3        | 5.2                    | 0    |                | 0.0  |
|                                                  | Endometrial cancer        | 1        | 1.7                    | 0    |                | 0.0  |
| Therapy regimen at inclusion <sup>†,‡</sup>      | Monotherapy               | 35       | 60.3                   | 7    | 0.339<br>0.343 |      |
|                                                  | Combined therapy          | 23       | 39.7                   | 8    |                | 53.3 |
|                                                  | Cap Beva                  | 11       | 19.0                   | 4    |                | 26.7 |
|                                                  | Cap Beva Ox               | 1        | 1.7                    | 0    |                | 0.0  |
|                                                  | Cap Lap                   | 1        | 1.7                    | 0    |                | 0.0  |
|                                                  | Cap Ox                    | 3        | 5.2                    | 1    |                | 6.7  |
|                                                  | Cap Vin                   | 1        | 1.7                    | 1    |                | 6.7  |
|                                                  | Cap Mito                  | 0        | 0.0                    | 1    |                | 6.7  |
|                                                  | Cap Trastu Ox             | 0        | 0.0                    | 1    |                | 6.7  |
|                                                  | Cap Fulve                 | 2        | 3.4                    | 0    |                | 0.0  |
|                                                  | Cap Vin Letro             | 1        | 1.7                    | 0    |                | 0.0  |
|                                                  | Cap Trastu                | 3        | 5.2                    | 0    |                | 0.0  |
|                                                  | Treatment intention       | curative | 8                      | 13.8 |                | 3    |
| palliative                                       |                           | 50       | 86.2                   | 12   | 80.0           |      |
| Classified time since diagnosis                  | < ½ year                  | 15       | 25.9                   | 4    | 0.712          |      |
|                                                  | ½ to 2 years              | 22       | 37.9                   | 4    |                | 26.7 |
|                                                  | > 2 years                 | 21       | 36.2                   | 7    |                | 46.7 |
| Therapy setting                                  | Oncology outpatient       | 51       | 87.9                   | 9    | 0.021          |      |
|                                                  | ward                      |          |                        |      |                |      |
|                                                  | Oncology practice         | 7        | 12.1                   | 6    |                | 40.0 |

<sup>†</sup> Therapy regimens: Cap = capecitabine monotherapy; Cap Beva = capecitabine + bevacizumab; Cap Beva Ox = capecitabine + bevacizumab + oxaliplatin; Cap Lap = capecitabine + lapatinib; Cap Ox = capecitabine + oxaliplatin; Cap Vin = capecitabine + vinorelbine; Cap Mito = capecitabine + mitomycin; Cap Trastu Ox = capecitabine + trastuzumab + oxaliplatin; Cap Fulve = capecitabine + fulvestrant; Cap Vin Letro = capecitabine + vinorelbine + letrozole; Cap Trastu = capecitabine + trastuzumab

<sup>‡</sup> Bisphosphonate and radiation therapies are not considered.

Formatted: Font: 10 pt, Font color: Text 1

#### Initially adherent patients

Initially adherent patients were observed for a median time of 119.0 days (range 21.0-152.0; IQR=69.8-126.0). During all observed cycles, a high percentage of these patients showed a daily adherence equal or greater 90% (Figure 2A). After the sixth cycle, 36 of 37 (97.3%, CI 88.8%-99.4%) initially adherent patients showed a daily adherence  $\geq 90\%$ . Since the CI does not include 75% it is shown with a [type I error of the first kind](#) of 5% that more than 75% of the initially adherent patients remained adherent after the modular medication management (without specific adherence support).

Figure 2B shows the same kind of data analysis for the daily intake adherence (excluding therapy-free interval). The fraction of initially adherent patients with a daily intake adherence  $\geq 90\%$  was lower compared to daily adherence reflecting that adherence is lower during intake than rest periods.

Figure 3 demonstrates that variability with regard to daily adherence increased from cycle 1 compared to further cycles. Median daily adherence was 100% in every cycle. [Average-Mean](#) daily adherence decreased from 98.9% in cycle 1 to 97.3% in cycle 6. Online table A provides more detailed information. Although initially adherent patients did not receive [specific](#) adherence support, [the modular medication management led to](#) a consistently high median daily adherence in a majority of these patients [was observed](#). Only in exceptional cases median daily adherence was observed to be lower than 90%. Individual daily adherence profiles of each patient over the observation period are provided in online figure A.

Online table A: Daily adherence of initially adherent patients (calculation based on intake and rest period)

|         | n  | Mean [%] | Median [%] | SD [%] | Range [%]  | IQR [%]     |
|---------|----|----------|------------|--------|------------|-------------|
| Cycle 1 | 58 | 98.9     | 100.0      | 2.1    | 93.3-100.0 | 100.0-100.0 |
| Cycle 2 | 56 | 97.3     | 100.0      | 5.5    | 66.7-100.0 | 95.2-100.0  |
| Cycle 3 | 48 | 97.2     | 100.0      | 4.9    | 75.0-100.0 | 95.2-100.0  |
| Cycle 4 | 45 | 96.7     | 100.0      | 6.3    | 68.8-100.0 | 95.2-100.0  |
| Cycle 5 | 40 | 97.4     | 100.0      | 4.7    | 80.0-100.0 | 95.2-100.0  |
| Cycle 6 | 37 | 97.3     | 100.0      | 7.3    | 57.1-100.0 | 95.2-100.0  |

#### Initially non-adherent patients

Initially non-adherent patients were observed for a median time of 118.0 days (range 35.0-140.0; IQR=96.0-126.0). Figure 2A illustrates the percentage of patients who showed a daily adherence equal or greater than 90% during the different cycles. [Adherence increased in association with the specific support provided. The results indicate a clear effect of adherence support.](#) In cycle 2 the [number of percentage of](#) adherent patients was [80.0% \(12/15\)](#) compared



to 40.0% (6/15) ~~twice as high as~~ in cycle 1 and ~~it ranged between 75.0 % and 84.6% in the following cycles 3 to 6~~ remained relatively constant in the later cycles. After completion of the sixth cycle, daily adherence of six out of eight (75.0%, CI 46.0%-91.3%) initially non-adherent patients accounted for  $\geq 90\%$ . Since the CI included 80% which was the cut-off value used for sample size determination of initially non-adherent patients, it could not be proven that  $>80\%$  of initially non-adherent patients were adherent after the intervention.

Figure 2B shows the percentage of initially non-adherent patients with a daily intake adherence  $\geq 90\%$  over the cycles. In contrast to the initially adherent patients, the fractions of initially non-adherent patients exhibiting a daily adherence  $\geq 90\%$  and a daily intake adherence  $\geq 90\%$  did not exhibit major differences.

Median daily adherence increased from 85.7% in cycle 1 to 97.6% in cycle 6, see figure 4. ~~Average-Mean~~ daily adherence accounted for 80.8% during the first cycle and was found to be greater than 90% during the application of the adherence support module (online table B). Adherence varied widely between patients but also from cycle to cycle in the same patients. Online figure B shows individual daily adherence profiles of initially non-adherent patients during the course of the study calculated for intake plus rest period.

Online table B: Daily adherence of initially non-adherent patients (calculation based on intake and rest period)

|         | n  | Mean [%] | Median [%] | SD [%] | Range [%]  | IQR [%]    |
|---------|----|----------|------------|--------|------------|------------|
| Cycle 1 | 15 | 80.8     | 85.7       | 17.6   | 28.6-92.9  | 85.0-90.5  |
| Cycle 2 | 15 | 93.7     | 95.2       | 8.8    | 71.4-100.0 | 95.0-100.0 |
| Cycle 3 | 13 | 90.7     | 95.2       | 13.6   | 59.1-100.0 | 90.5-100.0 |
| Cycle 4 | 12 | 92.1     | 95.2       | 7.0    | 76.2-100.0 | 90.5-95.2  |
| Cycle 5 | 12 | 92.7     | 95.2       | 7.2    | 79.2-100.0 | 88.1-97.6  |
| Cycle 6 | 8  | 90.5     | 97.6       | 15.1   | 57.1-100.0 | 85.7-100.0 |

### Potential predictors of adherence

There was no indication of an existing relationship between patients' daily adherence during the first cycle and their age (Spearman's  $r=0.009$ ,  $p=0.941$ ) or gender ( $p=0.891$ , Mann-Whitney-U test). In addition, there was not any significant association between daily adherence and any further socio-demographic and disease-related characteristics.

### Persistence

1  
2  
3  
4  
5  
6 All study patients were persistent during the whole period they were prescribed capecitabine  
7 chemotherapy. No patient performed an unauthorised discontinuation of his capecitabine  
8 treatment.  
9

10 However, in 17 of the 58 (29.3%) initially adherent patients capecitabine therapy was  
11 discontinued prematurely by the physicians. In 12 patients this decision was taken due to  
12 tumour progression. Further reasons for therapy discontinuation were adverse drug reactions  
13 (hand-foot syndrome and haemolytic anemia), hospital admission, the toxicity of a co-  
14 administered drug, and the patient's wish to stop treatment. 36 (62.1%) patients completed six  
15 cycles as planned, two patients (3.4%) completed less than six capecitabine cycles as planned,  
16 one patient (1.7%) died after the completion of the third cycle and two patients quit their study  
17 participation during the second cycle.  
18  
19  
20

21 In five of 15 (33.3%) initially non-adherent patients capecitabine therapy was discontinued  
22 prematurely due to tumour progression. Eight patients (53.3%) completed six capecitabine  
23 cycles as planned, one patient (6.7%) completed five cycles as planned, and one patient died  
24 during the second cycle.  
25  
26  
27  
28  
29  
30  
31  
32  
33  
34  
35  
36  
37  
38  
39  
40  
41  
42  
43  
44  
45  
46  
47  
48  
49  
50  
51  
52  
53  
54  
55  
56  
57  
58  
59  
60

## DISCUSSION

In this study, we applied a systematic screening for non-adherent patients at an early stage of their capecitabine chemotherapy to provide a patient-tailored modular medication management. The results indicate that specific adherence support might improve adherence of initially non-adherent patients to capecitabine and that initially adherent patients' medication taking behaviour persists over time under basic pharmaceutical care and adverse event management.

### Sample size of initially non-adherent patients

A major limitation of our study is the relatively small number of initially non-adherent patients. Instead of the required sample size of 30 initially non-adherent patients, only 15 patients could be enrolled during the study period. Previous data suggested a distribution of 60% initially adherent and 40% initially non-adherent patients.<sup>25</sup> The actual distribution within our patient population was 80% to 20%. This has to be considered before interpreting data of the initially non-adherent patients. However, a clear trend towards an improved adherence over time was observed. Further multicenter studies are needed to provide better generalisable findings.

### Adherence screening

For the classification of patients as initially non-adherent or adherent, we used daily adherence of the first drug intake period plus the first day of the therapy-free interval assessed by MEMS<sup>®</sup>. Consideration of the whole capecitabine cycle would have provided a more complete picture of the participant's adherence during the first cycle. However, this was not feasible. To initiate adherence support before the start of cycle 2, an exact appointment on day 21 of the first cycle for group allocation would have been necessary. A belated start of the adherence supporting module would have biased the results of initially non-adherent patients.

~~Although~~ Our approach [using the gold standard of adherence assessment](#) was suitable to discriminate between adhering and non-adhering patients. ~~In theory~~ it would be [less costly and labour intensive](#) to identify non-adhering patients [alternatively](#) by means of possible predictors. ~~With knowledge of adherence predictors a screening method without costly and labour intensive electronic monitoring could be developed~~, eg by a specific questionnaire. In general, numerous factors associated with non-adherence to oral anti-cancer drugs have been identified like eg side effects, forgetfulness, or disliking aspects of treatment.<sup>20 30</sup> On the basis of our data, it was, [however](#), not possible to derive significant information on adherence from socio-demographic or disease-related characteristics, eg age. Indeed, we observed that the three patients exhibiting the lowest baseline adherence during cycle 1 (28.6%, 57.1%, and 64.3%) were of a relatively

old age (90, 75, and 79 years). However, from this result it cannot be concluded that adherence decreases with increasing age as there were also elderly patients exhibiting high adherence. Our findings are in line with the findings of Partridge et al who did not find an association of adherence and age.<sup>21</sup> Furthermore, Bhattacharya et al did not identify significant associations between self-reported adherence to capecitabine and experience of side effects, beliefs about capecitabine, or satisfaction with information. However, the generalisability of that study was also limited by a relatively small sample size.<sup>24</sup> Therefore, larger multi-centre studies are necessary to identify precise predictors of non-adherence to capecitabine.

### Effect of modular medication management

Adherence rates in our study were higher than those reported by Partridge et al who found an average overall adherence measured by MEMS<sup>®</sup> (defined as the number of doses taken divided by the number of doses prescribed) between 70% to 80%.<sup>21</sup> Analysing our data the same way, overall adherence values ranged between 98.2% and 100.5% in initially adherent patients and between 93.8% and 102.7% in initially non-adherent patients. ~~This High adherence results in this study might be explained by the fact that every participant of the present study received two pharmaceutical care medication management-modules during all six cycles. Regardless the specific adherence support, elements of module 1 and 2, such as an individual medication plan and patient counselling regarding -prophylaxis, detection and treatment of adverse effects, might have had a beneficial effect on adherence of both initially adherent and initially non-adherent patients as shown previously<sup>25</sup>.~~

~~However, i~~n case of initially non-adherent patients, the provided adherence support might have increased adherence additionally. This finding is consistent with previous results from our working group. Under the provision of intensified pharmaceutical care to 48 breast and colorectal cancer patients, the intervention group showed an increased mean overall adherence in comparison to the control group.<sup>25</sup> In line with previous results <sup>21 25 25</sup>, non-persistence did not present a problem in our group of patients.

### Daily adherence versus daily intake adherence

Daily adherence during the intake periods of each cycle was generally lower compared to daily adherence calculated on the basis of drug intake plus rest period. This implies that adherence to the regimen was better in the rest period when the drug should not be taken, i.e. not many patients took the drug by mistake. However, ~~daily adherence calculated for the first intake interval plus the first day of the rest period in initially non-adherent patients was lower than daily adherence during the whole cycle or adherence during the intake interval alone. E~~ight of

Formatted: Superscript

15 (53.3%) patients took capecitabine one day too long, too short or completely ignored the break. From this finding we conclude that special attention has to be paid to the change of drug intake to drug-free days in the first capecitabine cycle. Patients have to be educated in detail regarding this particularity of [the capecitabine treatment regimen](#). [The attending health care provider should inform the patient exactly on the dates of the intake-free period](#). [Written notes can serve as mnemonic devices](#). [Future studies should further facilitate the development of appropriate adherence parameters in order to improve the reflection of the longitudinal aspect of adherence data](#).

Formatted: Font: Not Bold, English (U.S.)

### Adherence management

Even though daily adherence could be improved in initially non-adherent patients, it has to be pointed out that this patient population did not reach the same adherence level as initially adherent patients. Moreover, inter-individual variability of adherence was higher. This finding suggests that a subgroup of patients with low adherence benefits from the adherence-enhancing intervention as suggested by Simons et al.<sup>25</sup> However, a certain number of patients cannot be reached and reveals a resistant medication taking behaviour. Reasons for intentional non-adherence in those patients were difficulties in swallowing tablets due to nausea and emesis caused by capecitabine (despite the provision of antiemetic prophylaxis and treatment), averseness to medication, or “compensating” intake for previous non-adherence during treatment break. Unintentional non-adherence was mainly based on forgetfulness. Further research should include a systematic approach to develop strategies for adherence management in those ‘resistant’ patients. [The adherence of intentionally non-adherent patients could be enhanced by means of advanced educational interventions](#). [Behavioural interventions such as medication dosette boxes or alarm clocks could be used more extensively in the adherence enhancement of unintentionally non-adherent patients](#).

Formatted: English (U.S.)

Formatted: English (U.S.)

### Conclusions

In summary, the results of this study demonstrate the potential of an early adherence screening for non-adherence and an individually applied modular medication management to use limited resources most efficiently. The provided adherence support ~~improved~~ [is associated with enhanced](#) adherence of initially non-adherent patients to oral chemotherapy. Moreover, the provision of basic pharmaceutical care and adverse event management was sufficient to maintain adherence in initially adherent patients for at least six cycles. The identification of potential predictors of adherence would facilitate the utilisation and broad application of the proposed adherence screening and modular medication management.

## Acknowledgements, Competing interests, Funding

**Acknowledgements:** We thank all patients who were willing to participate in our study. Furthermore, we thank Regina Moka as well as all oncologists and nurses who supported the conduction of our study.

**Funding:** A supplementary grant was provided by Roche, Basel. However, the researchers were entirely independent during all phases of this work.

**Competing interests:** All authors have completed the ICMJE uniform disclosure at [www.icmje.org/coi\\_disclosure.pdf](http://www.icmje.org/coi_disclosure.pdf) (available on request from the corresponding author) and declare that there have been no competing interests.

**Patient consent:** Obtained.

**Ethics approval:** This study was conducted with the approval of the ethics committee of the University of Bonn, Germany (consecutive number 042/09).

**Contributorship statement:** LK and UJ conceived the study design, substantially contributed to data analysis and interpretation, and drafted the manuscript. LK, YDK, PFS and CS were involved in the data collection and provision of multidisciplinary patient care. RF contributed substantially to statistical data analysis and interpretation. UJ is the guarantor. All authors critically reviewed the manuscript and gave their final approval for the version to be published.

**Provenance and peer review:** Not commissioned; externally peer reviewed.

**Data sharing statement:** Extra data is available by emailing Ulrich Jaehde ([u.jaehde@uni-bonn.de](mailto:u.jaehde@uni-bonn.de)).

All authors, external and internal, had full access to all of the data (including statistical reports and tables) in the study and can take responsibility for the integrity of the data and the accuracy of the data analysis.

## REFERENCES

1. Findlay M, Minckwitz G von, Wardley A. Effective oral chemotherapy for breast cancer: pillars of strength. *Ann Oncol* 2008;**19**:212–22.
2. Weingart SN, Brown E, Bach PB, *et al*. NCCN Task Force Report: Oral chemotherapy. *J Natl Compr Canc Netw* 2008;**6**(Suppl 3):S1-14.
3. Halfdanarson TR, Jatoi A. Oral cancer chemotherapy: the critical interplay between patient education and patient safety. *Curr Oncol Rep* 2010;**12**:247–52.
4. Schott S, Schneeweiss A, Reinhardt J, *et al*. Acceptance of oral chemotherapy in breast cancer patients - a survey study. *BMC Cancer* 2011;**11**:129.
5. Górnaś M, Szczylik C. Oral treatment of metastatic breast cancer with capecitabine: what influences the decision-making process? *Eur J Cancer Care (Engl)* 2010;**19**:131–6.
6. Weingart SN, Flug J, Brouillard D, *et al*. Oral chemotherapy safety practices at US cancer centres: questionnaire survey. *BMJ* 2007;**334**:407.
7. Wood L. A review on adherence management in patients on oral cancer therapies. *Eur J Oncol Nurs* 2012;**16**:432–8.
8. Parsad SD, Ratain MJ. Prescribing oral chemotherapy. *BMJ* 2007;**334**:376.
9. Schneider SM, Hess K, Gosselin T. Interventions to promote adherence with oral agents. *Semin Oncol Nurs* 2011;**27**:133–41.
10. Cassidy J. First-line oral capecitabine therapy in metastatic colorectal cancer: a favorable safety profile compared with intravenous 5-fluorouracil/leucovorin. *Ann Oncol* 2002;**13**:566–75.
11. Walko CM, Lindley C. Capecitabine: a review. *Clin Ther* 2005;**27**:23–44.
12. Sabaté E. Adherence to long-term therapies: evidence for action. Geneva: WHO; 2003.
13. Cutler DM, Everett W. Thinking outside the pillbox-medication adherence as a priority for health care reform. *N Engl J Med* 2010;**362**:1553–5.
14. Winterhalder R, Hoesli P, Delmore G, *et al*. Self-reported compliance with capecitabine: findings from a prospective cohort analysis. *Oncology* 2011;**80**:29–33.
15. Ruddy K, Mayer E, Partridge A. Patient adherence and persistence with oral anticancer treatment. *CA Cancer J Clin* 2009;**59**:56–66.
16. Osterberg L, Blaschke T. Adherence to medication. *N Engl J Med* 2005;**353**:487–97.
17. Waterhouse DM, Calzone KA, Mele C, *et al*. Adherence to oral tamoxifen: a comparison of patient self-report, pill counts, and microelectronic monitoring. *J Clin Oncol* 1993;**11**:1189–97.

Formatted: German (Germany)

18. Haynes RB, McDonald HP, Garg AX. Helping patients follow prescribed treatment: clinical applications. *JAMA* 2002;**288**:2880–3.
19. Spoelstra SL, Given CW. Assessment and measurement of adherence to oral antineoplastic agents. *Semin Oncol Nurs* 2011;**27**:116–32.
20. Foulon V, Schöffski P, Wolter P. Patient adherence to oral anticancer drugs: an emerging issue in modern oncology. *Acta Clin Belg* 2011;**66**:85–96.
21. Partridge AH, Archer L, Kornblith AB, *et al*. Adherence and persistence with oral adjuvant chemotherapy in older women with early-stage breast cancer in CALGB 49907: adherence companion study 60104. *J Clin Oncol* 2010;**28**:2418–22.
22. Muss HB, Berry DA, Cirincione CT, *et al*. Adjuvant chemotherapy in older women with early-stage breast cancer. *N Engl J Med* 2009;**360**:2055–65.
23. Mayer EL, Partridge AH, Harris LN, *et al*. Tolerability of and adherence to combination oral therapy with gefitinib and capecitabine in metastatic breast cancer. *Breast Cancer Res Treat* 2009;**117**:615–23.
24. Bhattacharya D, Easthall C, Willoughby KA, *et al*. Capecitabine non-adherence: exploration of magnitude, nature and contributing factors. *J Oncol Pharm Pract* 2012;**18**:333–42.
25. Simons S, Ringsdorf S, Braun M, *et al*. Enhancing adherence to capecitabine chemotherapy by means of multidisciplinary pharmaceutical care. *Support Care Cancer* 2011;**19**:1009–18.
26. Vrijens B, Geest S de, Hughes DA, *et al*. A new taxonomy for describing and defining adherence to medications. *Br J Clin Pharmacol* 2012;**73**:691–705.
27. Cramer JA. Microelectronic systems for monitoring and enhancing patient compliance with medication regimens. *Drugs* 1995;**49**:321–7.
28. Denhaerynck K, Schäfer-Keller P, Young J, *et al*. Examining assumptions regarding valid electronic monitoring of medication therapy: development of a validation framework and its application on a European sample of kidney transplant patients. *BMC Med Res Methodol* 2008;**8**:5.
29. Demonceau J, Ruppert T, Kristanto P, *et al*. Identification and assessment of adherence-enhancing interventions in studies assessing medication adherence through electronically compiled drug dosing histories: a systematic literature review and meta-analysis. *Drugs* 2013;**73**:545–62.
30. Noens L, van Lierde M, Bock R de, *et al*. Prevalence, determinants, and outcomes of nonadherence to imatinib therapy in patients with chronic myeloid leukemia: the ADAGIO study. *Blood* 2009;**113**:5401–11.

Formatted: German (Germany)

Formatted: German (Germany)

Formatted: German (Germany)



## FIGURE AND TABLE LEGENDS

Figure 1: Patient recruitment flow diagram

Figure 2: Percentage of patients exhibiting a **A** daily adherence  $\geq 90\%$  (during intake and rest periods) and a **B** daily intake adherence  $\geq 90\%$  (during the intake periods only)

Figure 3: Daily adherence of initially adherent patients during cycle 1 to 6 (the median is represented by the black band in every box; bottom and top of each box are the first and third quartiles; circles are 1.5-3 times the box height away from the box; stars are  $>3$  times the box height away from the box)

Figure 4: Daily adherence of initially non-adherent patients during cycle 1 to 6 (the median is represented by the black band in every box; bottom and top of each box are the first and third quartiles; circles are 1.5-3 times the box height away from the box; stars are  $>3$  times the box height away from the box)

Table 1: Socio-demographic and disease-related patient characteristics

Online figure A: Individual daily adherence of initially adherent patients during the course of the study; each different coloured line represents one patient, the black line represents median daily adherence; cycle 1: n=58, cycle 2: n=56, cycle 3: n=48, cycle 4: n=45, cycle 5: n=40, cycle 6: n=37; the black line represents median daily adherence

Formatted: Font: Not Italic

Online figure B: Individual daily adherence of initially non-adherent patients during the course of the study; each different coloured line represents one patient, the black line represents median daily adherence; cycle 1: n=15, cycle 2: n=15, cycle 3: n=13, cycle 4: n=12, cycle :5 n=12, cycle 6: n=8; the black line represents the median daily adherence

Online table A: Daily adherence of initially adherent patients (calculation based on intake and rest period)

Online table B: Daily adherence of initially non-adherent patients (calculation based on intake and rest period)

**STROBE statement - checklist of items that should be included in reports of observational studies**

**Krolop et al.**

**Adherence management for cancer patients on capecitabine: a prospective two-arm cohort study**

|                              | Item No | Recommendation                                                                                                                                                                                                                                                                                                                                                                                                                                                         |                |
|------------------------------|---------|------------------------------------------------------------------------------------------------------------------------------------------------------------------------------------------------------------------------------------------------------------------------------------------------------------------------------------------------------------------------------------------------------------------------------------------------------------------------|----------------|
| <b>Title and abstract</b>    |         |                                                                                                                                                                                                                                                                                                                                                                                                                                                                        |                |
|                              | 1       | (a) Indicate the study's design with a commonly used term in the title or the abstract                                                                                                                                                                                                                                                                                                                                                                                 | OK             |
|                              |         | (b) Provide in the abstract an informative and balanced summary of what was done and what was found                                                                                                                                                                                                                                                                                                                                                                    | OK             |
| <b>Introduction</b>          |         |                                                                                                                                                                                                                                                                                                                                                                                                                                                                        |                |
| Background/rationale         | 2       | Explain the scientific background and rationale for the investigation being reported                                                                                                                                                                                                                                                                                                                                                                                   | OK             |
| Objectives                   | 3       | State specific objectives, including any prespecified hypotheses                                                                                                                                                                                                                                                                                                                                                                                                       | OK             |
| <b>Methods</b>               |         |                                                                                                                                                                                                                                                                                                                                                                                                                                                                        |                |
| Study design                 | 4       | Present key elements of study design early in the paper                                                                                                                                                                                                                                                                                                                                                                                                                | OK             |
| Setting                      | 5       | Describe the setting, locations, and relevant dates, including periods of recruitment, exposure, follow-up, and data collection                                                                                                                                                                                                                                                                                                                                        | OK             |
| Participants                 | 6       | (a) <i>Cohort study</i> —Give the eligibility criteria, and the sources and methods of selection of participants. Describe methods of follow-up<br><i>Case-control study</i> —Give the eligibility criteria, and the sources and methods of case ascertainment and control selection. Give the rationale for the choice of cases and controls<br><i>Cross sectional study</i> —Give the eligibility criteria, and the sources and methods of selection of participants | OK             |
|                              |         | (b) <i>Cohort study</i> —For matched studies, give matching criteria and number of exposed and unexposed<br><i>Case-control study</i> —For matched studies, give matching criteria and the number of controls per case                                                                                                                                                                                                                                                 | Not applicable |
| Variables                    | 7       | Clearly define all outcomes, exposures, predictors, potential confounders, and effect modifiers. Give diagnostic criteria, if applicable                                                                                                                                                                                                                                                                                                                               | OK             |
| Data sources/<br>measurement | 8*      | For each variable of interest, give sources of data and details of methods of assessment (measurement). Describe comparability of assessment methods if there is more than one group                                                                                                                                                                                                                                                                                   | OK             |
| Bias                         | 9       | Describe any efforts to address potential sources of                                                                                                                                                                                                                                                                                                                                                                                                                   | Not            |

|                        |     | bias                                                                                                                                                                                                                                                                                                      | applicable     |
|------------------------|-----|-----------------------------------------------------------------------------------------------------------------------------------------------------------------------------------------------------------------------------------------------------------------------------------------------------------|----------------|
| Study size             | 10  | Explain how the study size was arrived at                                                                                                                                                                                                                                                                 | OK             |
| Quantitative variables | 11  | Explain how quantitative variables were handled in the analyses. If applicable, describe which groupings were chosen and why                                                                                                                                                                              | OK             |
| Statistical methods    | 12  | (a) Describe all statistical methods, including those used to control for confounding                                                                                                                                                                                                                     | OK             |
|                        |     | (b) Describe any methods used to examine subgroups and interactions                                                                                                                                                                                                                                       | OK             |
|                        |     | (c) Explain how missing data were addressed                                                                                                                                                                                                                                                               | OK             |
|                        |     | (d) <i>Cohort study</i> —If applicable, explain how loss to follow-up was addressed<br><i>Case-control study</i> —If applicable, explain how matching of cases and controls was addressed<br><i>Cross sectional study</i> —If applicable, describe analytical methods taking account of sampling strategy | Not applicable |
|                        |     | (e) Describe any sensitivity analyses                                                                                                                                                                                                                                                                     | Not applicable |
| <b>Results</b>         |     |                                                                                                                                                                                                                                                                                                           |                |
| Participants           | 13* | (a) Report numbers of individuals at each stage of study—eg numbers potentially eligible, examined for eligibility, confirmed eligible, included in the study, completing follow-up, and analysed                                                                                                         | OK             |
|                        |     | (b) Give reasons for non-participation at each stage                                                                                                                                                                                                                                                      | OK             |
|                        |     | (c) Consider use of a flow diagram                                                                                                                                                                                                                                                                        | OK             |
| Descriptive data       | 14* | (a) Give characteristics of study participants (eg demographic, clinical, social) and information on exposures and potential confounders                                                                                                                                                                  | OK             |
|                        |     | (b) Indicate number of participants with missing data for each variable of interest                                                                                                                                                                                                                       | OK             |
|                        |     | (c) <i>Cohort study</i> —Summarise follow-up time (eg average and total amount)                                                                                                                                                                                                                           | OK             |
| Outcome data           | 15* | <i>Cohort study</i> —Report numbers of outcome events or summary measures over time                                                                                                                                                                                                                       | OK             |
|                        |     | <i>Case-control study</i> —Report numbers in each exposure category, or summary measures of exposure                                                                                                                                                                                                      | -              |
|                        |     | <i>Cross sectional study</i> —Report numbers of outcome events or summary measures                                                                                                                                                                                                                        | -              |
| Main results           | 16  | (a) Give unadjusted estimates and, if applicable,                                                                                                                                                                                                                                                         | Not            |

|                          |    |                                                                                                                                                                            |                |
|--------------------------|----|----------------------------------------------------------------------------------------------------------------------------------------------------------------------------|----------------|
|                          |    | confounder adjusted estimates and their precision (eg 95% confidence interval). Make clear which confounders were adjusted for and why they were included                  | applicable     |
|                          |    | (b) Report category boundaries when continuous variables were categorised                                                                                                  | OK             |
|                          |    | (c) If relevant, consider translating estimates of relative risk into absolute risk for a meaningful time period.                                                          | Not applicable |
| Other analyses           | 17 | Report other analyses done—eg analyses of subgroups and interactions, and sensitivity analyses                                                                             | OK             |
| <b>Discussion</b>        |    |                                                                                                                                                                            |                |
| Key results              | 18 | Summarise key results with reference to study objectives                                                                                                                   | OK             |
| Limitations              | 19 | Discuss limitations of the study, taking into account sources of potential bias or imprecision. Discuss both direction and magnitude of any potential bias                 | OK             |
| Interpretation           | 20 | Give a cautious overall interpretation of results considering objectives, limitations, multiplicity of analyses, results from similar studies, and other relevant evidence | OK             |
| Generalisability         | 21 | Discuss the generalisability (external validity) of the study results                                                                                                      | OK             |
| <b>Other information</b> |    |                                                                                                                                                                            |                |
| Funding                  | 22 | Give the source of funding and the role of the funders for the present study and, if applicable, for the original study on which the present article is based              | OK             |

Online table A: Daily adherence of initially adherent patients (calculation based on intake and rest period)

|         | <b>n</b> | <b>Mean [%]</b> | <b>Median [%]</b> | <b>SD [%]</b> | <b>Range [%]</b> | <b>IQR [%]</b> |
|---------|----------|-----------------|-------------------|---------------|------------------|----------------|
| Cycle 1 | 58       | 98.9            | 100.0             | 2.1           | 93.3-100.0       | 100.0-100.0    |
| Cycle 2 | 56       | 97.3            | 100.0             | 5.5           | 66.7-100.0       | 95.2-100.0     |
| Cycle 3 | 48       | 97.2            | 100.0             | 4.9           | 75.0-100.0       | 95.2-100.0     |
| Cycle 4 | 45       | 96.7            | 100.0             | 6.3           | 68.8-100.0       | 95.2-100.0     |
| Cycle 5 | 40       | 97.4            | 100.0             | 4.7           | 80.0-100.0       | 95.2-100.0     |
| Cycle 6 | 37       | 97.3            | 100.0             | 7.3           | 57.1-100.0       | 95.2-100.0     |

Online table B: Daily adherence of initially non-adherent patients (calculation based on intake and rest period)

|         | <b>n</b> | <b>Mean [%]</b> | <b>Median [%]</b> | <b>SD [%]</b> | <b>Range [%]</b> | <b>IQR [%]</b> |
|---------|----------|-----------------|-------------------|---------------|------------------|----------------|
| Cycle 1 | 15       | 80.8            | 85.7              | 17.6          | 28.6-92.9        | 85.0-90.5      |
| Cycle 2 | 15       | 93.7            | 95.2              | 8.8           | 71.4-100.0       | 95.0-100.0     |
| Cycle 3 | 13       | 90.7            | 95.2              | 13.6          | 59.1-100.0       | 90.5-100.0     |
| Cycle 4 | 12       | 92.1            | 95.2              | 7.0           | 76.2-100.0       | 90.5-95.2      |
| Cycle 5 | 12       | 92.7            | 95.2              | 7.2           | 79.2-100.0       | 88.1-97.6      |
| Cycle 6 | 8        | 90.5            | 97.6              | 15.1          | 57.1-100.0       | 85.7-100.0     |
